# Supplementary material for: Biogeochemical model of CO 2 and CH 4 production in anoxic Arctic soil microcosms
Source: Copernicus journal article supplement (doi:10.5194/bg-2016-207), 2016-05-20
Supplement: Supplementary file 1 [file bg-2016-207-supplement.zip]

# Supplement Information

## Biogeochemical model of CO<sub>2</sub> and CH<sub>4</sub> production in anoxic Arctic soil microcosms

Guoping Tang<sup>1</sup>, Jianqiu Zheng<sup>2</sup>, Xiaofeng Xu<sup>3</sup>, Ziming Yang<sup>1</sup>, David E. Graham<sup>2,4</sup>, Baohua Gu<sup>1</sup>, Scott Painter<sup>1,4</sup>, and Peter E. Thornton<sup>1,4</sup>

<sup>1</sup>Environmental Sciences Division, Oak Ridge National Laboratory, Oak Ridge TN, 37831 USA

<sup>2</sup>Biosciences Sciences Division, Oak Ridge National Laboratory, Oak Ridge TN, 37831 USA

<sup>3</sup>Biology Department, San Diego State University, San Diego, CA, 92182 USA

<sup>4</sup>Climate Change Science Institute, Oak Ridge National Laboratory, Oak Ridge TN, 37831 USA

Correspondence to: Guoping Tang (guopingtangva@gmail.com)

Table S1. Additional experimental parameter values summarized from (Herndon et al., 2015; Roy Chowdhury et al., 2015).

| Location | Horizon | Formate (mgC) | Acetate (mgC) | Propionate (mgC) | TOTC/d wt Soil | WEOC /TOTC | Acids/WE OC | f(pH) |
|----------|---------|---------------|---------------|------------------|----------------|------------|-------------|-------|
| Center   | Oa      | 0.3162        | 1.7185        | 0.0445           | 38.35%         | 1.77%      | 21.69%      | 0.486 |
|          | Bgh     | 0.0198        | 0.3524        | 0.0213           | 13.78%         | 0.31%      | 10.23%      | 0.384 |
| Ridge    | Oe      | 0.0012        | 0.0046        | 0.0104           | 38.89%         | 0.54%      | 0.24%       | 0.601 |
|          | Bh      | 0.0270        | 0.3420        | 0.0399           | 14.65%         | 0.26%      | 12.46%      | 0.241 |
| Trough   | Oe      | 0.0016        | 0.0062        | 0.0140           | 20.55%         | 0.38%      | 0.66%       | 0.614 |
|          | Bh/ice  | 0.0204        | 0.2617        | 0.0104           | 7.99%          | 0.30%      | 14.53%      | 0.445 |

Table S2. Model parameter values for base scenario

| Symbol       | Value              | Description                                                                  |
|--------------|--------------------|------------------------------------------------------------------------------|
| $f_{labile}$ | 0.0005             | Initial fraction of LabileC in TOTC                                          |
| $f_{som1}$   | 0.01               | Initial fraction of SOM1 in TOTC                                             |
| $f_{som2}$   | 0.02               | Initial fraction of SOM2 in TOTC                                             |
| $f_{som3}$   | 0.1                | Initial fraction of SOM3 in TOTC                                             |
| $f_{ferb}$   | $2 \times 10^{-6}$ | Initial fraction of Fe reducers in TOTC                                      |
| $f_{mega}$   | $10^{-6}$          | Initial fraction of acetoclastic methanogens in TOTC                         |
| $f_{megh}$   | $10^{-6}$          | Initial fraction of hydrogenotrophic methanogens in TOTC                     |
| $f_{mega}$   | $10^{-6}$          | Initial fraction of SOM4 in TOTC                                             |
| $f_{fe3}$    | 0.0025             | Initial Fe(III) as a fraction of soil dry weight                             |
| $S_{labile}$ | 0.4                | Fraction of the original CLM-CN respiration factor goes through labile pool. |

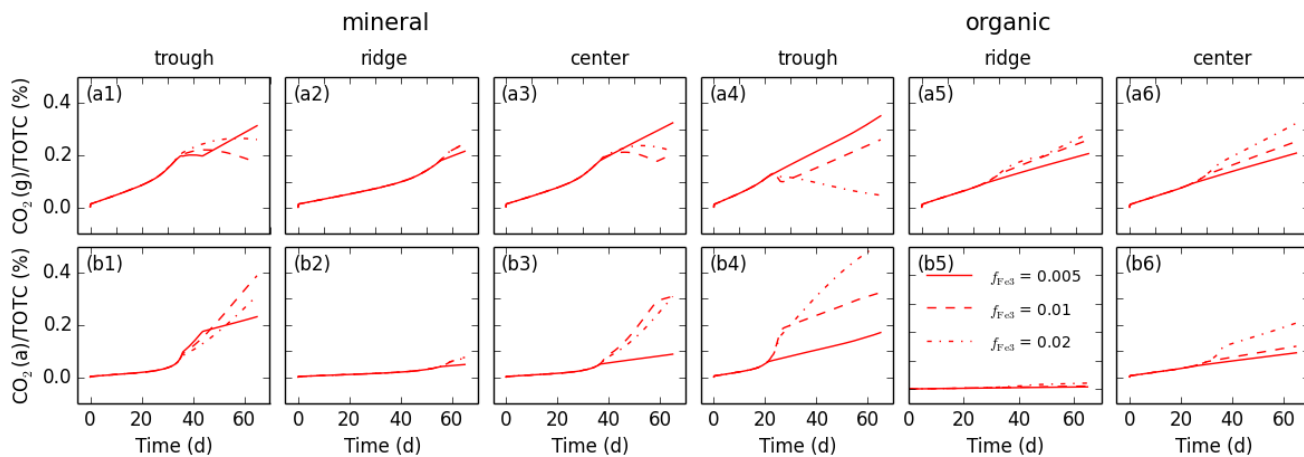

5 **Figure S1:** Calculated partition of  $\text{CO}_2$  in gas and aqueous phases as a percentage of initial TOTC with different  $f_{\text{Fe}3}$  values. The results correspond to Fig. 2 for temperature 8 °C. With increasing  $f_{\text{Fe}3}$ , the pH increases at the late times, as does the  $\text{CO}_2$  solubility.

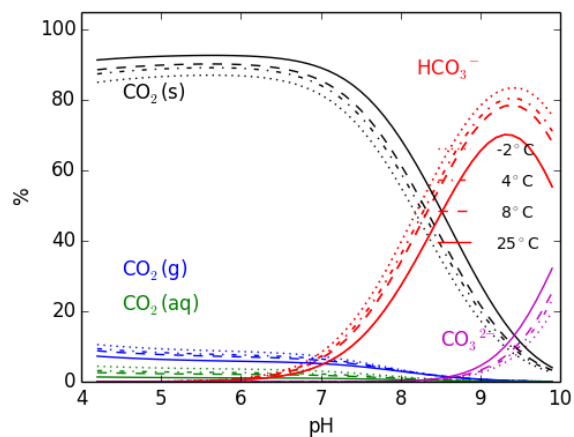

10 **Figure S2:** Adding 1 mmol  $\text{Fe}(\text{OH})_3\text{a}$  into the numerical experiments shown in Fig. 3, the gas-phase fraction is decreased at low pH values.

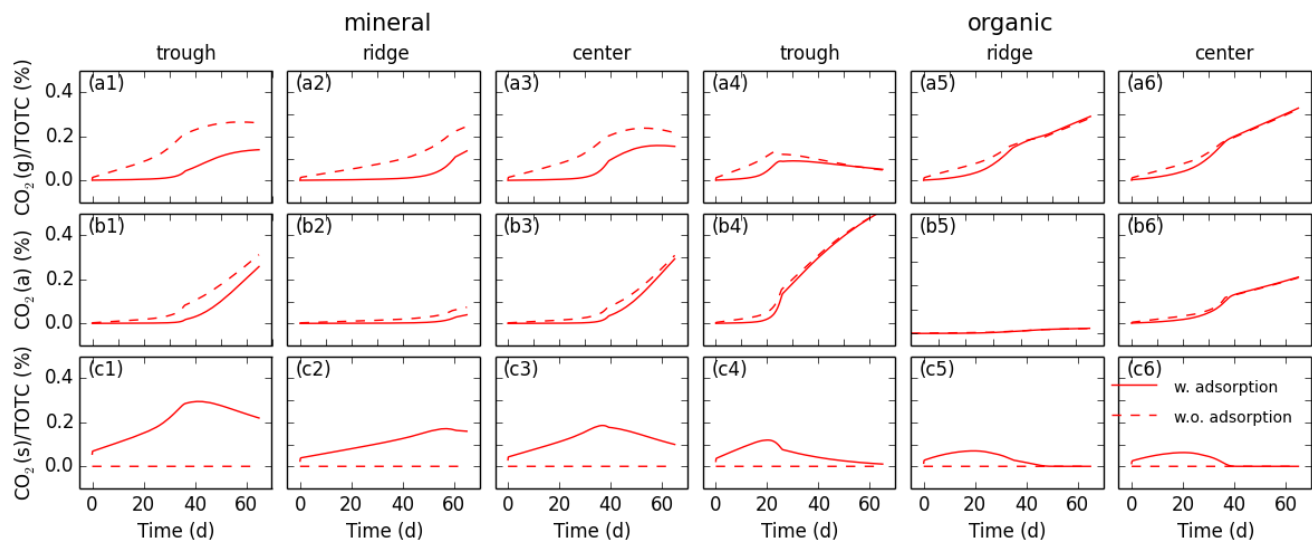

**Figure S3: Impact of adsorption of  $\text{CO}_2$  to ferric oxide surfaces on the distribution among gas, aqueous and solid phases.**

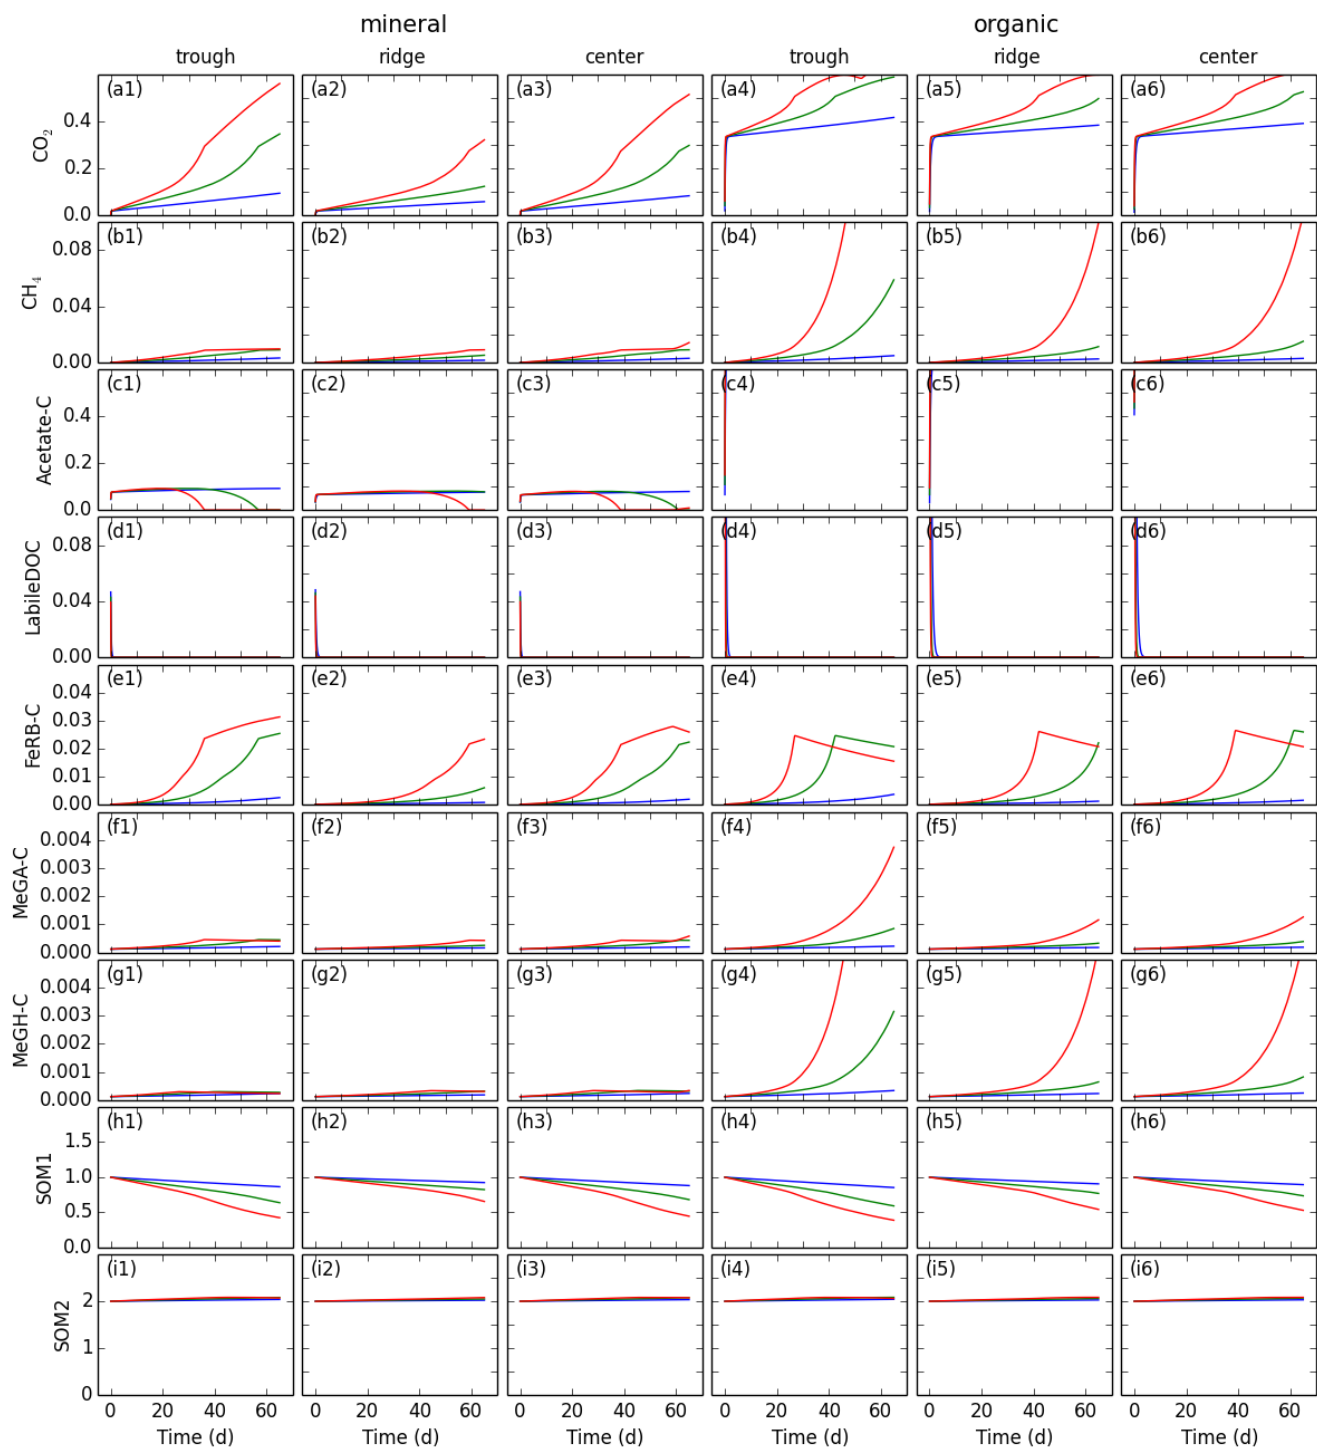

**Figure S4: Partition of carbon among various organic pools.** a, b, and c are for CO<sub>2</sub> distribution in the gas (head space), aqueous (water), and adsorbed (sorption to Fe(OH)<sub>3</sub>a). See Fig.2 caption for more description about the model and experimental parameters.

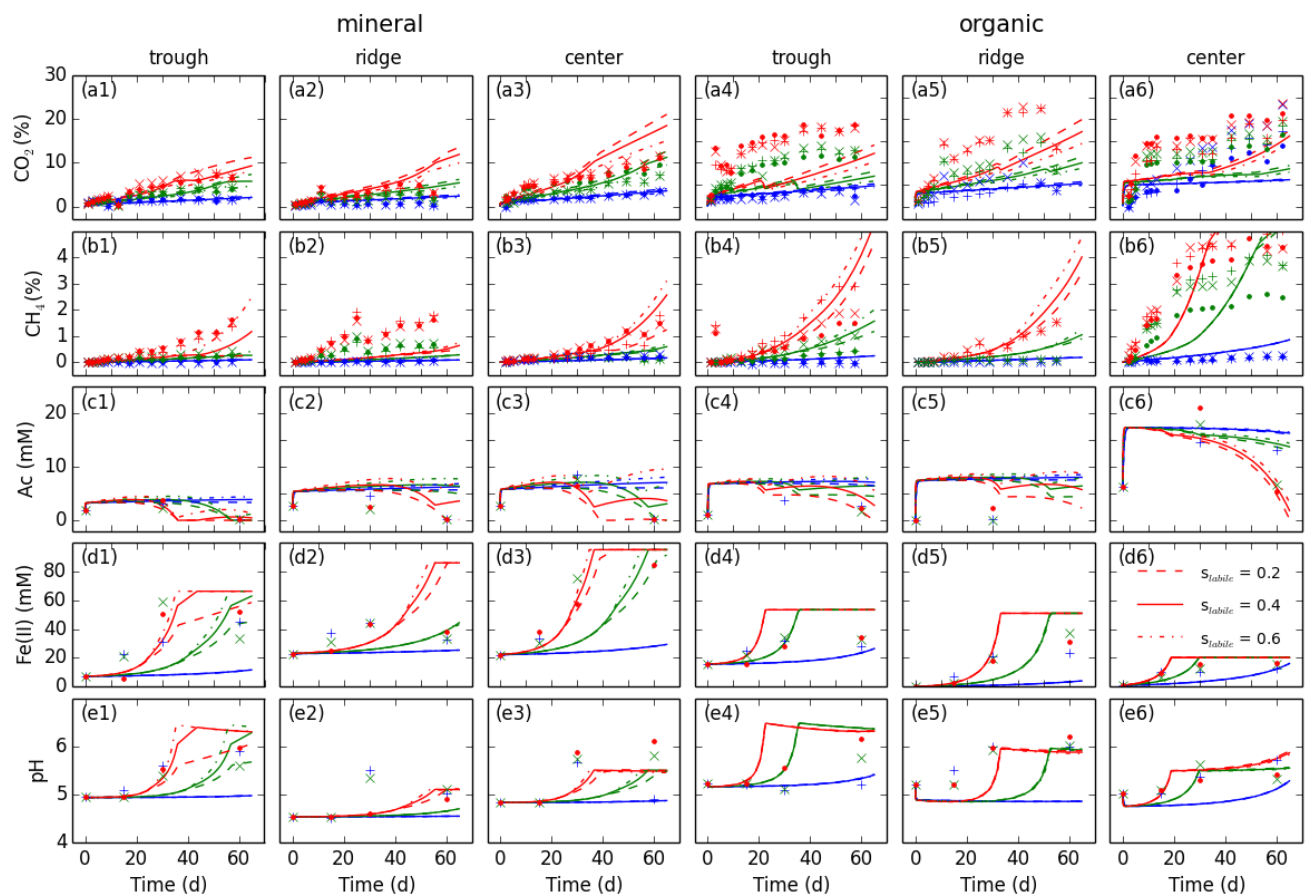

**Figure S5: Impact of indirect respiration fraction ( $s_{\text{stable}}$ ) WHAM on predictions. See Fig.2 caption for more description about the model and experimental parameters.**

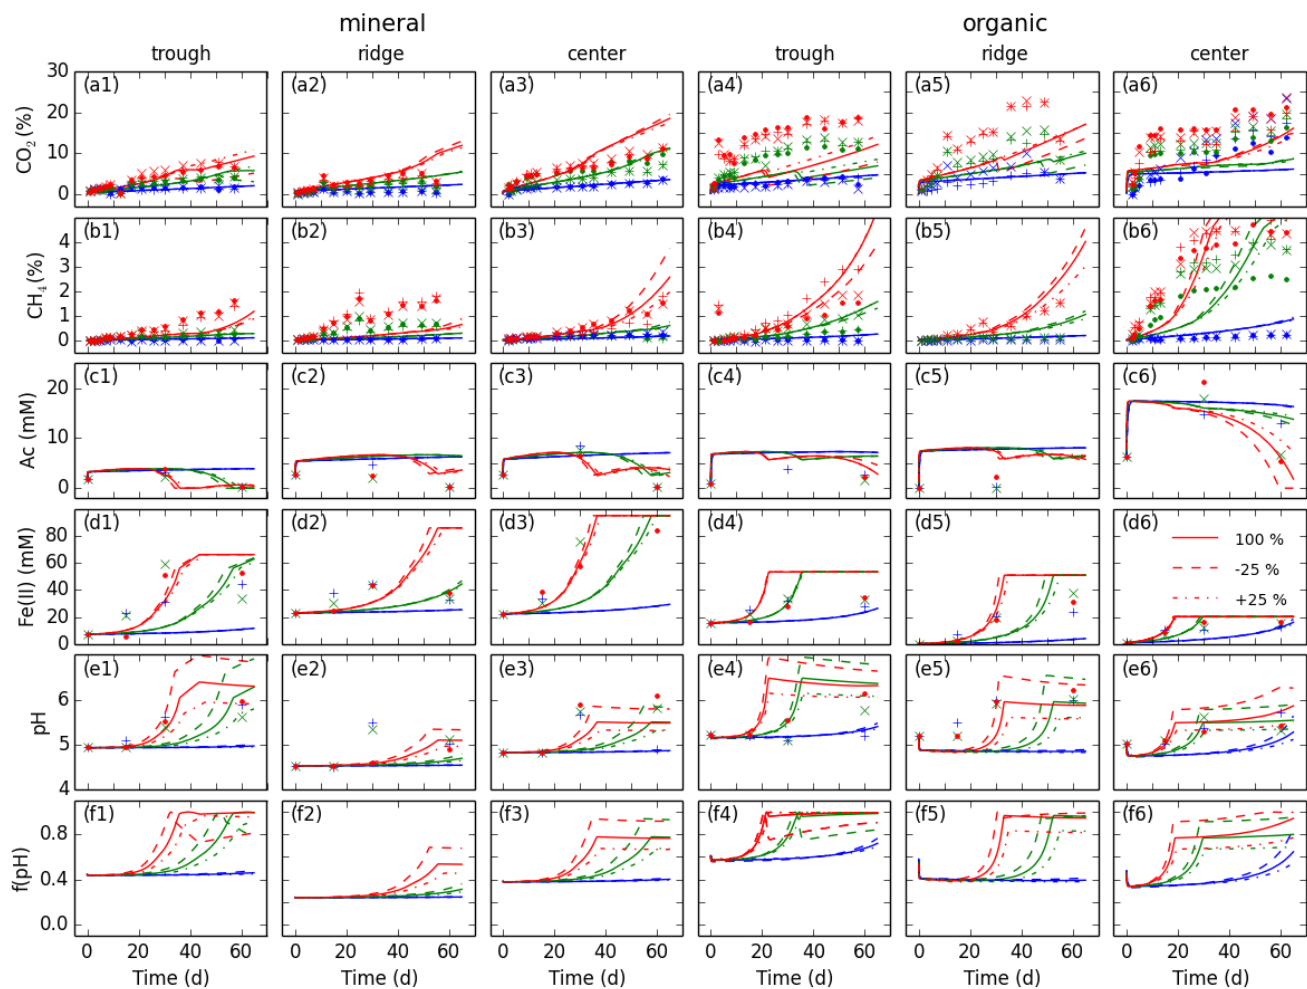

**Figure S6: Impact of specified organic matter in WHAM on predictions. See Fig.2 caption for more description about the model and experimental parameters.**

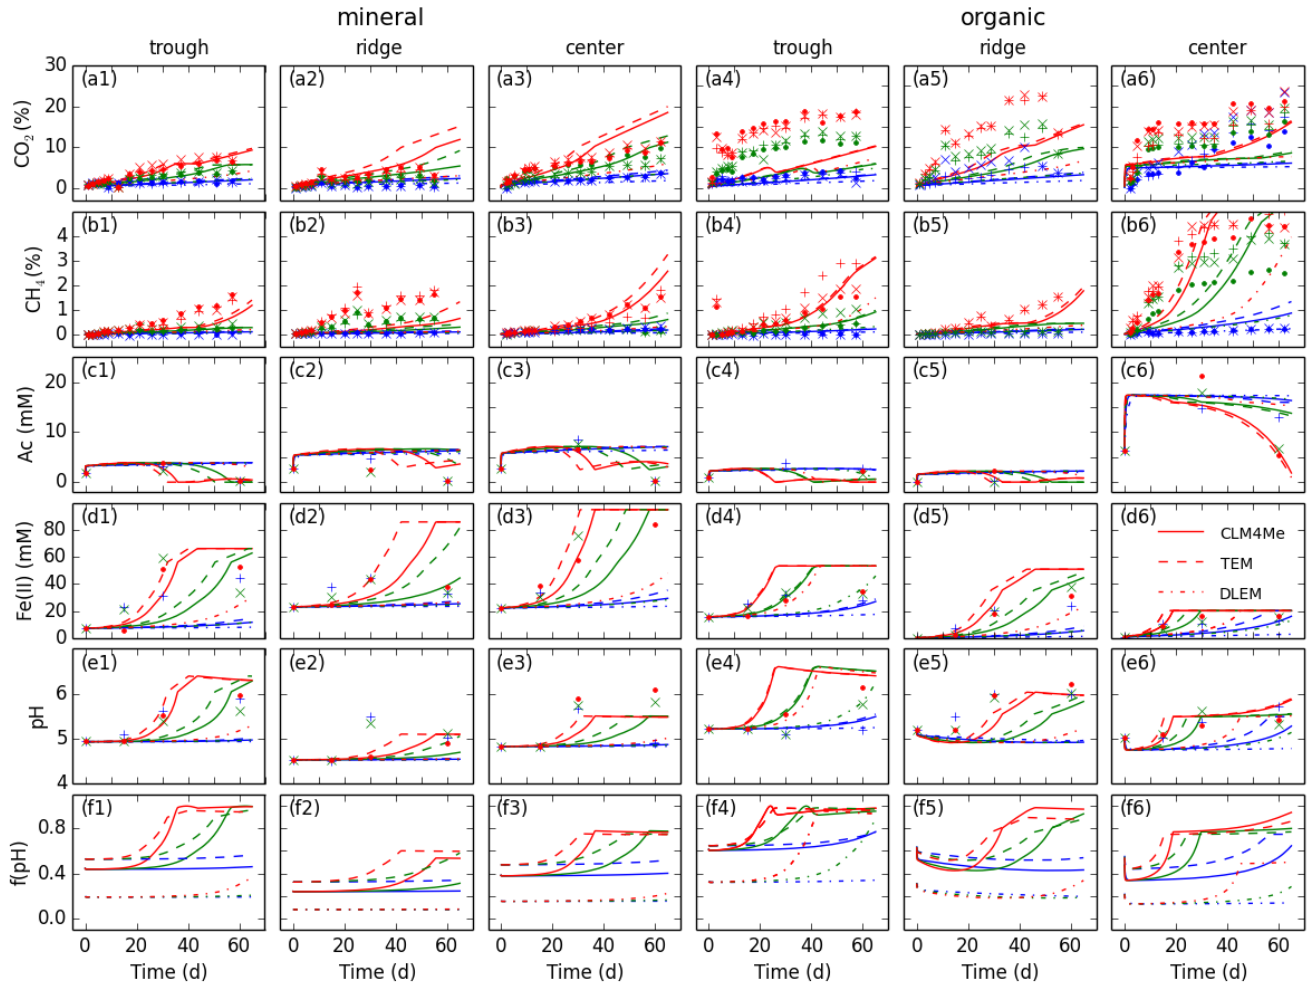

**Figure S7: Comparison of the impact of different pH response functions (CLM4Me, TEM, and DLEM) on predictions.**

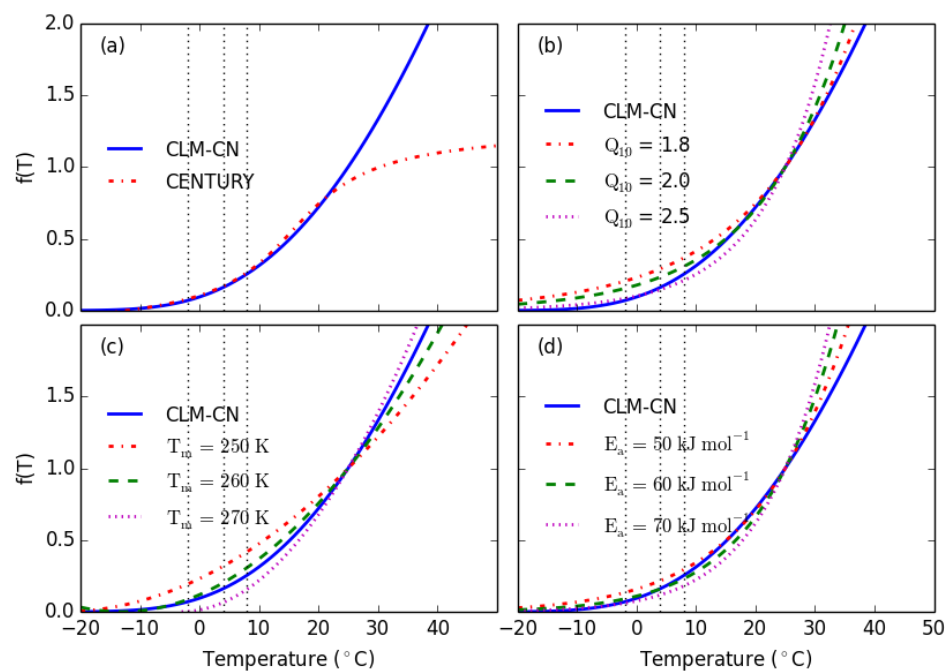

Figure S8: Fig. 7 with arithmetic vertical scale.



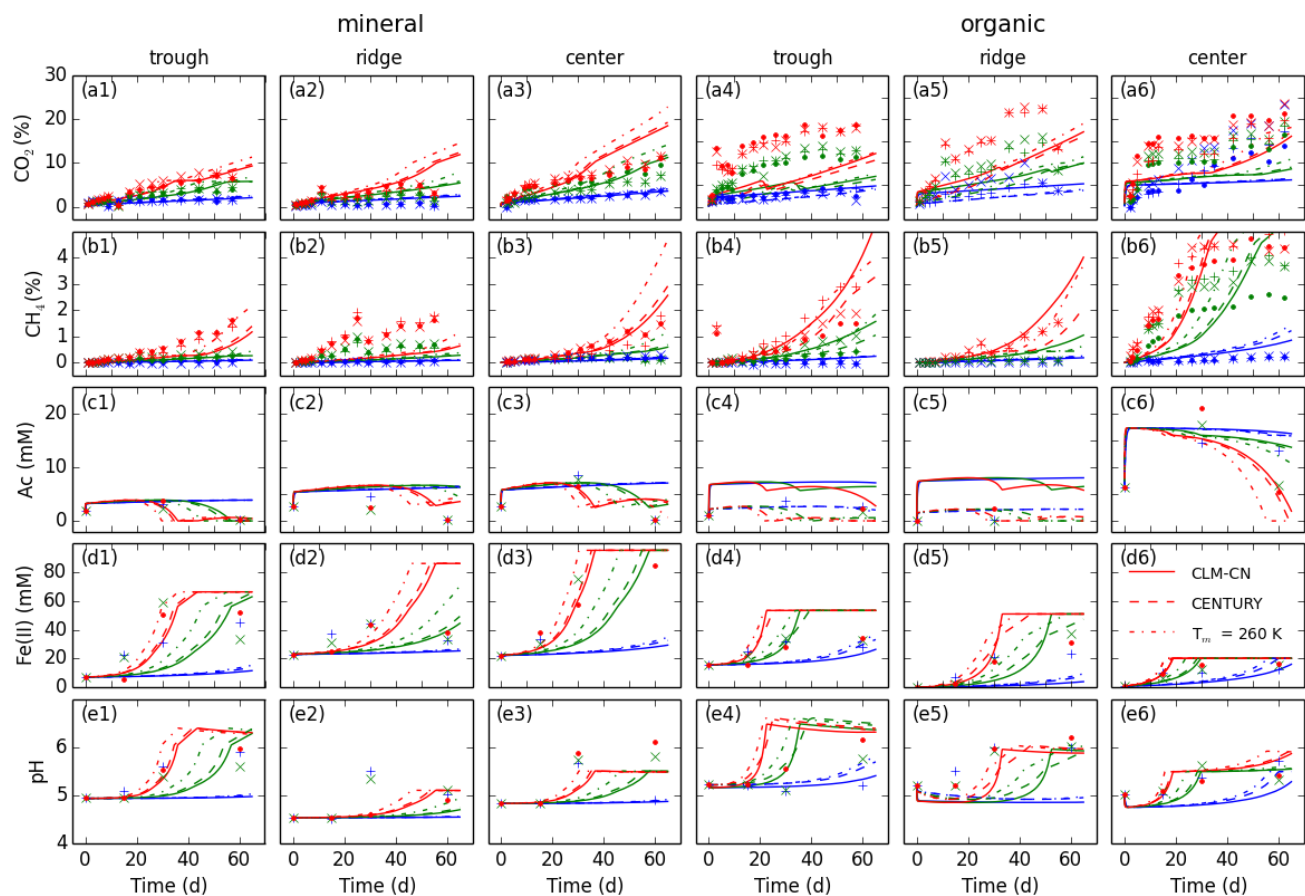

**Figure S9: Comparison of impact of different temperature response functions (CLM-CN, CENTURY, Ratkowsky Equation with  $T_m = 260$ ) on predictions.**

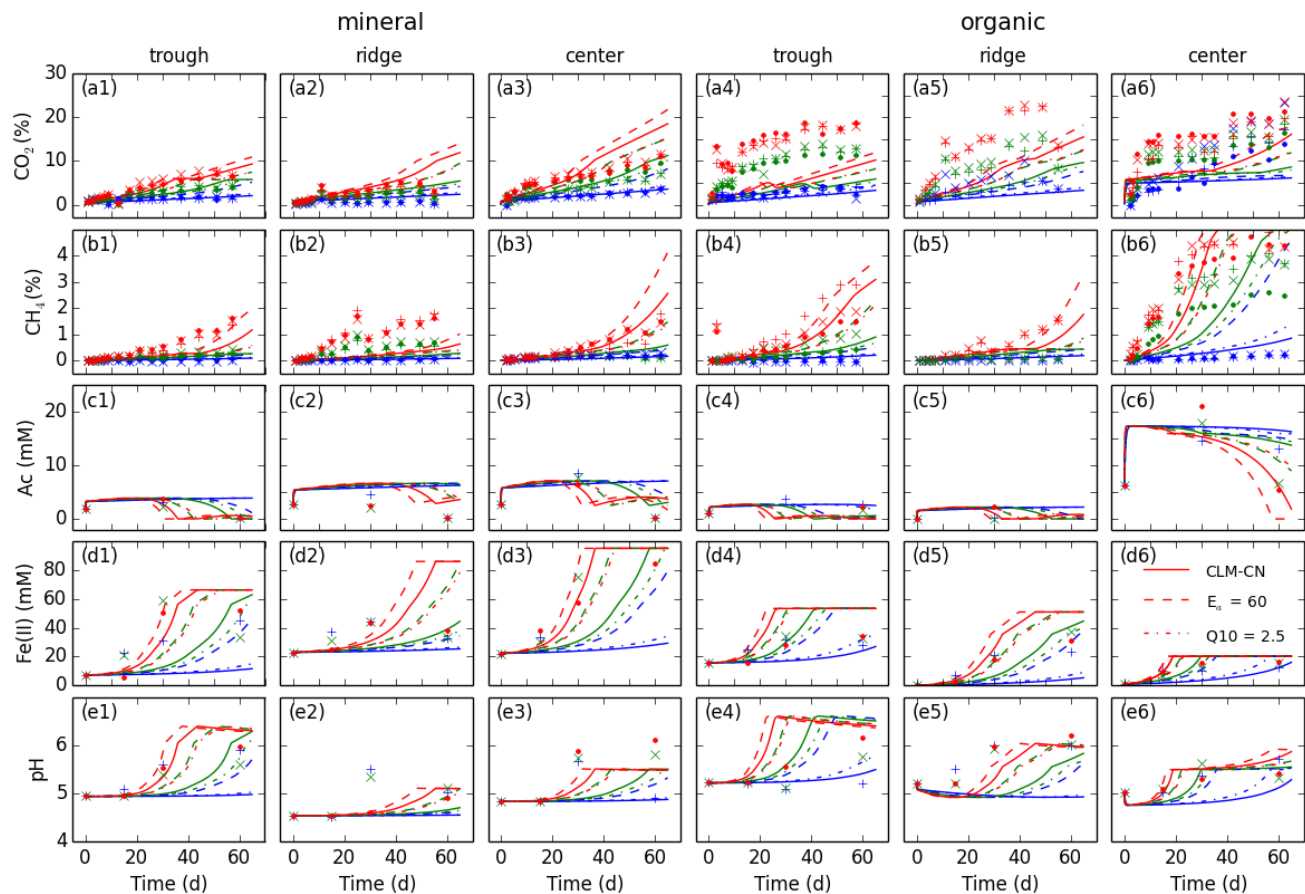

**Figure S10: Comparison of impact of different temperature response functions (CLM-CN, Arrhenius equation ( $E_a$ ),  $Q_{10}$  Equation) on predictions**

#### References

- 5 Herndon, E. M., Mann, B. F., Chowdhury, T. R., Yang, Z., Wulfschleger, S. D., Graham, D., Liang, L., and Gu, B.: Pathways of anaerobic organic matter decomposition in tundra soils from Barrow, Alaska, *Journal of Geophysical Research: Biogeosciences*, n/a-n/a, 10.1002/2015JG003147, 2015.
- Roy Chowdhury, T., Herndon, E. M., Phelps, T. J., Elias, D. A., Gu, B., Liang, L., Wulfschleger, S. D., and Graham, D. E.: Stoichiometry and temperature sensitivity of methanogenesis and  $CO_2$  production from saturated polygonal tundra in Barrow, Alaska, *Global Change Biology*, 21, 722-737, 10.1111/gcb.12762, 2015.
- 10
