# Supplementary material for: Biogeochemical model of CO 2 and CH 4 production in anoxic Arctic soil microcosms
Source: Copernicus journal article supplement (doi:10.5194/bg-2016-207), 2016-05-20
Supplement: Supplementary file 1 [file microcosmmodel.xlsx]

## Sheet: Table1R
	Table 1 Physicochemical characteristics of soils from three microtopographic sites of a low-centered polygon. Values in parenthesis are standard deviations (n = 3)
		Soil Horizon
		Depth	Description	Soil color	Water content		pH (KCl)		Fe(II)		Total C		C/N	texture class
		(cm)			(g/g dwt soil)		(1:5, w/v)		(umol/g dwt soil)		(mg/g dwt soil)		(gC/gN?)
					mean	std dev	mean	std dev	mean	std dev	mean	std dev
	Ridge	0-8	Oe	10YR3/2	3.67	0.37	5.21	0.01	5.91	-1.04	388.9	5.9	17	Silt
		8-42	Bh	10YR2/2	0.74	0	4.54	0.02	17	-0.38	146.47	3.9	26	Silt
		42-56	Ice	na
	Center1	6-21.5	Oa	2.5Y3/2	9.62	0.44	5.02	0.07	7.59	-0.47	383.5	60.9	23	Silt
		21.5-53.5	Bgh	2.5Y2/1	0.64	0.01	4.84	0	14.23	-0.87	137.8	2.8	23	Silt
		53.5-93	Ice	na
	Center2	4-15	Oa	10YR2/1
		15-40	A/B	10YR3/2	1.06	0.01	5.12	0	10.02	-2.7	455.8	25.7	22	na*
		40-55	Bgh	na
		55-82	Cf	10YR3/2	0.43	0.03	5.92	0	15.6	-0.36	175.2	10.4	23	na*
	Trough	0-19	Oe	5YR3/2	2.48	0.49	5.23	0	38.85	-5.71	205.5	6.3	19	Silt
		19-25	Oa/Bh	10YR3/3
		25-69	Bh/ice	10YR3/2	0.79	0.11	4.95	0	5.67	-4.5	79.9	1.2	26	Silt

## Sheet: Table4R
	Table 4 Fe(II) concentration and pH changes in microcosms during incubation
				Fe(II) (lmol g 1 dwt. soil)* after incubation for (days)							pHKCl
	Microtopography	Soil Horizon	T (°C)	15		30		60		15	30	60		dwt soil
				mean	stddev	mean	stddev	mean	stddev
	Center	Organic	8	101.4	5.8	98.1	70.1	122.5	1.8	5.02	5.38	5.71
			4	63.5	7.8	120.9	0.6	150.3	2.3	5.09	5.62	5.32
			-2	89.3	7.5	154.8	2.8	159.7	5.8	5.09	5.31	5.42
		Mineral	8	21.4	3.3	69.9	7.8	185.9	17	4.83	5.67	4.9
			4	19.6	1.6	48.4	3.8	198.3	10.2	4.9	5.74	5.81
			-2	24.6	0.8	36.7	5.6	54	5.1	4.88	5.89	6.1
	Ridge	Organic	8	26.8	3.9	76.5	5.7	87.2	4.2	5.5	6	6
			4	9.6	1.5	71.6	11.1	137.6	13.2	5.21	5.92	6.02
			-2	8.6	0.8	65.7	4	114.9	8.5	5.21	5.98	6.21
		Mineral	8	27.8	3.6	32.7	4.5	24.1	2.3	4.5	5.5	5.03
			4	22.8	6.8	32.6	1.6	24.8	0.8	4.54	5.34	5.12
			-2	18.4	0.7	32.4	3.8	28.3	6.6	4.54	4.6	4.9
	Trough	Organic	8	62.9	3.4	80	16	69	7.6	5.2	5.1	5.2
			4	54.1	4.2	84.4	5.2	82	6.2	5.23	5.11	5.76
			-2	39.8	1.9	69.6	10.1	84.7	15.9	5.23	5.55	6.15
		Mineral	8	18.2	2.2	24.4	4.7	35.4	1.5	5.1	5.61	5.9
			4	16.7	1.8	46.8	1.3	26.7	4.2	4.95	5.39	5.61
			-2	4.5	0.3	40.2	2	41.4	3.8	4.95	5.53	5.98

## Sheet: Table1H
Table 1. Properties of the organic and mineral horizons of three representative soil cores from
Trough, Ridge, and Center microtopographic features of a low-center polygon
NGEE ID	Position	Horizon	Layer depth		Water content g H2O/g soil		SOC Cwt. %
NGADG0009-1	Trough	Organic	0	-	19	2.48	20.5
NGADG0005-1	Ridge	Organic	0	-	8	3.67	38.9
NGADG0017-1	Center	Organic	0	-	21.5	9.62	38.3
NGADG0009-2	Trough	Mineral	25	-	69	0.79	8
NGADG0005-2	Ridge	Mineral	8	-	46	0.74	14.6
NGADG0017-2	Center	Mineral	21.5	-	53.5	0.64	13.8

## Sheet: Table2H
Table S1: Concentrations of water-soluble carbon used to calculate ΔWSC in Figure 2
Core ID	Temperature	Water-soluble C (µmol C g-soil-1 )
		Organic Horizon			Mineral Horizon
	°C	0 d	30 d	60 d	0 d	30 d	60 d
NGADG0009	-2	64.2	86.7	108	20	40	37.5
Trough	4		103	141		30.8	18.3
	8		122	96.7		28.3	27.5
NGADG0005	-2	176	206	-	31.7	38.3	22.5
Ridge	4		251	-		35	33.3
	8		242	-		31.7	34.2
NGADG0017	-2	565a	724	579	35	35.8	30.8
Center	4		629	613		36.7	40
	8		670	598		33.3	25.8
Core ID	Temperature	Water-soluble C (µmol C g-SOC-1 )
		Organic Horizon			Mineral Horizon
	°C	0 d	30 d	60 d	0 d	30 d	60 d
NGADG0009	-2	313	423	527	250	501	469	4.87539	4.87889	4.87963	12.5	12.525	12.5067
Trough	4		502	688		385	229		4.87379	4.87943		12.5	12.5137
	8		595	472		354	344		4.87705	4.88108		12.5088	12.5091
NGADG0005	-2	452	529	-	217	262	154	2.56818	2.56796	#VALUE!	6.84543	6.84073	6.84444
Ridge	4		645	-		239	228		2.56972	#VALUE!		6.82857	6.84685
	8		622	-		217	234		2.57025	#VALUE!		6.84543	6.84211
NGADG0017	-2	1,480a	1890	1510	254	259	223	2.61947	2.6105	2.60794	7.25714	7.23464	7.24026
Center	4		1640	1600		266	289		2.60731	2.61011		7.24796	7.225
	8		1750	1560		241	187		2.61194	2.6087		7.23724	7.24806

## Sheet: Table3H
Table 3. Concentrations of individual organic acids in water-extractable organic carbon normalized to soil organic carbon
(μmol g-SOC-1) for soils incubated for 0, 30, or 60 days
Concentrations of organic acids (µmol C g-1 SOC) included in Figure 5.
Sample	Temperature	Formate			Acetate			Propionate			Butyrate
	deg C	0 d	30 d	60 d	0 d	30 d	60 d	0 d	30 d	60 d	0 d	30 d	60 d
RO	-2	0.08	0.11		0.154242	1.87886		0.231362	0.231362		<DL	<DL	<DL
	4	0.08	0.08		0.154242	0.0878973		0.231362	0.231362		<DL	<DL	<DL
	8	0.08	0.55		0.154242	12.2115		0.231362	5.78041		<DL	<DL	<DL
TO	-2	0.15	0.08	0.29	0.292683	1.98218	1.98557	0.439024	1.20438	0.439024	<DL	<DL	<DL
	4	0.15	3.55	0.09	0.292683	58.3938	0.891699	0.439024	22.2756	0.439024	<DL	<DL	<DL
	8	0.15	3	0.11	0.292683	58.3938	1.59293	0.439024	40.6049	0.439024	<DL	<DL	<DL
CO	-2	48.6	5.51	5.72	132.078	228.773	198.343	2.27811	33.5248	35.0914	<DL	43.6	37.1
	4	48.6	7.1	0.08	132.078	307.373	44.1037	2.27811	50.9138	56.9363	<DL	31.2	18.9
	8	48.6	8.93	0.71	132.078	361.775	12.1964	2.27811	72.2977	54.2649	<DL	28.4	20.1
RM	-2	1.78	1.83	0.21	11.2743	11.104	0.410959	0.877943	7.80177	0.616438	<DL	<DL	<DL
	4	1.78	0.21	0.21	11.2743	5.43364	0.410959	0.877943	3.26723	0.616438	<DL	<DL	<DL
	8	1.78	0.21	0.21	11.2743	2.80381	0.410959	0.877943	6.29942	0.616438	<DL	<DL	<DL
TM	-2	2.54	1.85	0.38	16.2703	16.2384	0.750939	0.429799	8.86058	1.12641	<DL	<DL	<DL
	4	2.54	6.96	0.38	16.2703	15.4116	0.289338	0.429799	2.56769	1.12641	<DL	<DL	<DL
	8	2.54	1.36	0.38	16.2703	18.0429	0.750939	0.429799	12.6486	1.12641	<DL	<DL	<DL
CM	-2	1.31	1.34	0.22	11.6381	29.0377	0.189458	0.469767	6.50881	0.652174	<DL	<DL	<DL
	4	1.31	1.36	0.22	11.6381	24.1316	0.387887	0.469767	7.18322	0.652174	<DL	<DL	<DL
	8	1.31	1.3	0.22	11.6381	22.7042	0.434783	0.469767	4.3048	0.652174	<DL	<DL	<DL
<DL means under detection limit
Organic acids conversion rates, ROA (umol C g-1 SOC d-1; Eq. 1) and linear regression for ROA = a + m x T in Figure 6.
Sample	Temperature	Organic Horizon		Mineral Horizon
	deg C	0-30 d	30-60 d	0-30 d	30-60 d
Ridge	-2	0.06	n.a.	0.23	-0.65
	4	0	n.a.	-0.17	-0.26
	8	0.6	n.a.	-0.15	-0.27
Regression (m)	-2	0.019		0.0039	-0.0059
Std. Err. M	4	0.017		0.0013	0.0028
R^2	8	0.56		0.9	0.82
Trough	-2	0.08	-0.02	0.26	-0.82
	4	2.78	-2.76	0.19	-0.77
	8	3.37	-3.33	0.43	-0.99
Regression (m)	-2	0.069	0.07	0.0014	0.0012
Std. Err. M	4	0.017	0.018	0.0016	0.0014
R^2	8	0.94	0.94	0.43	0.42
Center	-2	2.86	-0.96	0.78	-1.19
	4	6.08	-8.81	0.64	-1.05
	8	8.67	-12.53	0.5	-0.9
Regression (m)	-2	0.21	0.45	-0.0039	-0.004
Std. Err. M	4	0.0096	0.055	0.00049	0.00046
R^2	8	1	0.98	0.98	0.99

## Sheet: geochemistry
http://dx.doi.org/10.5440/1164833
Lab	Sample_ID	Method	Date_sampled	Month	PolygonalT	Location	Depth_cm	DeptHighlass	Area	northing	easting	lat	long_	elev	ALT_cm	Temp_DegC	TOC_mgL	DOC	TIC_mgL	pH_Lab	pH_Field	DO_perc	DO_mgL	Cond	Ag_ugL	Ag_ugL_Uncertainty	Al_mgL	Al_mgL_Uncertainty	As_mgL	As_mgL_Uncertainty	Ba_mgL	Ba_mgL_Uncertainty	Be_mgL	Be_mgL_Uncertainty	Bi_ugL	Bi_ugL_Uncertainty	B_mgL	B_mgL_Uncertainty	Br_mgL	Br_mgL_Uncertainty	Ca_mgL	Ca_mgL_Uncertainty	Cd_mgL	Cd_mgL_Uncertainty	Ce_mgL	Ce_mgL_Uncertainty	Cl_mgL	Cl_mgL_Uncertainty	Co_mgL
ORNL	NGADG0026_00	DP	2012-09-12	Sept	Low	Trough	0	Surface	A	7.9105e+06	585563	71.2816	-156.611				45.76			5.11	4.39						0.066	0.000327138			0.01015	0.000467076							0.178919	0.0211646	3.21	0.046043					66.2443	0.779407
ORNL	NGADG0027_00	DP	2012-09-12	Sept	Low	Trough	55	Deep	A	7.9105e+06	585563	71.2816	-156.611				121.002		18.5828	6.78	5.79						1.864	0.000327138			0.1568	0.000467076							0.27539	0.0211646	16.76	0.046043					62.7027	0.779407	0.01146
ORNL	NGALL0001_00	DP	2012-09-12	Sept	Low	Trough	55	Deep	A	7.9105e+06	585563	71.2816	-156.611				143.836		27.384	5.38	5.76						36.3	0.000327138			1.884	0.000467076							0.34103	0.0211646	57.4	0.046043					87.5957	0.779407	0.065
ORNL	NGALL0002_00	DP	2012-09-12	Sept	Low	Rim	38	Deep	A	7.91049e+06	585566	71.2816	-156.611				114.436		13.363	2.18	5.93						1.092	0.000327138			0.0982	0.000467076							0.1766	0.0211646	35.2	0.046043					1255.14	0.779407	0.00954
ORNL	NGALL0003_00	DP	2012-09-12	Sept	Low	Center	48.5	Deep	A	7.91049e+06	585572	71.2815	-156.61				498.37		27.0045	6.41	6.17						50.5	0.000327138			1.046	0.000467076							0.0695188	0.0211646	50.2	0.046043					27.4518	0.779407	0.0274
ORNL	NGALL0003_00_DUPLIC	DP	2012-09-12	Sept	Low	Center	48.5	Deep	A	7.91049e+06	585572	71.2815	-156.61				569.046		41.1908	6.07							8.87	0.000327138			0.298	0.000467076							0.0892118	0.0211646	24.8	0.046043					26.9421	0.779407	0.01134
ORNL	NGALL0004_00	DP	2012-09-12	Sept	Low	Center	46	Deep	A	7.91049e+06	585572	71.2815	-156.61				230.931		91.456	6.49	6.3						22.7	0.000327138			1.122	0.000467076							0.217472	0.0211646	56.4	0.046043					27.9164	0.779407	0.0468
ORNL	NGALL0004_00_DUPLIC	DP	2012-09-12	Sept	Low	Center	46	Deep	A	7.91049e+06	585572	71.2815	-156.61				243.895		11.685	6.67							12	0.000327138			0.66	0.000467076							0.774593	0.0211646	41.8	0.046043					32.9626	0.779407	0.0286
ORNL	NGADG0029_00	DP	2012-09-12	Sept	High	Trough	0	Surface	B	7.91025e+06	585787	71.2793	-156.605				48.8451			5.85	4.3						0.226	0.000327138			0.02215	0.000467076							0.0528231	0.0211646	6.305	0.046043					59.8613	0.779407	0.000579
ORNL	NGALL0008_00	DP	2012-09-12	Sept	High	Trough	40	Deep	B	7.91025e+06	585787	71.2793	-156.605				134.803		22.626	5.44	6						26	0.000327138			0.9	0.000467076							0.320915	0.0211646	49.4	0.046043					87.0971	0.779407	0.05
ORNL	NGADG0033_00	DP	2012-09-12	Sept	High	Trough	36	Deep	B	7.91025e+06	585787	71.2793	-156.605				82.528										1.29	0.000327138			0.1488	0.000467076									13.42	0.046043							0.000946
ORNL	NGADG0034_00	DP	2012-09-13	Sept	High	Trough	0	Surface	B	7.91025e+06	585787	71.2793	-156.605				110.965			4.84							12.8	0.000327138			0.456	0.000467076									31	0.046043							0.0296
ORNL	NGADG0030_00	DP	2012-09-12	Sept	Low	Center	0	Surface	C	7.91034e+06	585958	71.28	-156.6				34.649			4.92	4.7						0.0406	0.000327138			0.01845	0.000467076							0.0830949	0.0211646	4.45	0.046043					46.2481	0.779407	0.000185
ORNL	NGALL0005_00	DP	2012-09-12	Sept	High-transitional	Rim	30	Deep	C	7910300	585932	71.2797	-156.601				38.2404		25.2082	4.84	5.4						1.882	0.000327138			0.456	0.000467076							2.35696	0.0211646	61.4	0.046043					764.293	0.779407	0.0662
ORNL	NGALL0005_00_DUPLIC	DP	2012-09-12	Sept	High-transitional	Rim	50	Deep	C	7910300	585932	71.2797	-156.601				846.521		21.653	6.66							1.422	0.000327138			0.74	0.000467076							0.439304	0.0211646	96.2	0.046043					265.786	0.779407	0.13
ORNL	NGALL0006_00	DP	2012-09-12	Sept	High-transitional	Rim	45	Deep	C	7910300	585932	71.2797	-156.601				882.696		78.2135	6.49	6						12.3	0.000327138			1.282	0.000467076							2.31958	0.0211646	106.8	0.046043					757.239	0.779407	0.162
ORNL	NGALL0006_00_DUPLIC	DP	2012-09-12	Sept	High-transitional	Rim	45	Deep	C	7910300	585932	71.2797	-156.601				675.269										4.45	0.000327138			0.908	0.000467076					0.008				97.6	0.046043							0.1366
ORNL	NGALL0007_00	DP	2012-09-12	Sept	Low	Center	0	Surface	C	7.91034e+06	585958	71.28	-156.6				70.517		17.596	6.41	5.2						9.43	0.000327138			0.71	0.000467076									40.2	0.046043					18.6885	0.779407	0.0334
ORNL	NGALL0007_00_DUPLIC	DP	2012-09-12	Sept	Low	Center	0	Surface	C	7.91034e+06	585958	71.28	-156.6				74.8872										20.7	0.000327138			1.22	0.000467076									66	0.046043							0.07
ORNL	NGADG0036_00	DP	2012-09-13	Sept	Low	Rim	35	Deep	D	7910510	585925	71.2816	-156.6				291.57		3.4754	5.69	6						2.08	0.000327138			0.218	0.000467076							0.69385	0.0211646	34.6	0.046043					163.925	0.779407	0.0302
ORNL	NGADG0037_00	DP	2012-09-13	Sept	Low	Trough	45	Deep	D	7910508	585922	71.2816	-156.601				176.021		22.7914	6.21	5.8						1.59	0.000327138			0.1314	0.000467076							0.317213	0.0211646	18.34	0.046043					85.4129	0.779407	0.01386
LBL	LP1_1_20CM	DP	7/18/12_7/22/12	July	Low	Center	20	Deep	Site0GeoTransect	7.91034e+06	585384	71.2803	-156.616	5.097	28	9.5	71.7093		3.22366		5.45	36.4	4.13	256.3	<0.02		0.512	0.0209	0.00515	0.000339	0.0447	0.00178	<0.00007		<0.005		<0.003				9.56	0.228	<0.00002		0.001	4.81e-05	74.675	0.299178	0.00645
LBL	LP1_2_10CM	DP	7/18/12_7/22/12	July	Low	Center	10	Shallow	Site0GeoTransect	7.91035e+06	585386	71.2803	-156.616	4.889	29	6.6	49.5835		12.4227		6.1	10.1	1.18	370.7	<0.01		0.148	0.00715	0.00262	0.000209	0.0731	0.00332	<0.00007		<0.005		<0.003				14.9	0.385	<0.00002		0.000253	3.49e-05	95.2572	1.05394	0.00436
LBL	LP1_2_20CM	DP	7/18/12_7/22/12	July	Low	Center	20	Deep	Site0GeoTransect	7.91035e+06	585386	71.2803	-156.616			5.1	78.3111		9.1192		5.94	8.1	0.92	348.8	<0.02		0.408	0.0204	0.0064	0.000517	0.0965	0.00613	<0.00008		0.0484	0.00439	<0.002				17.1	0.21	<0.00002		0.00105	9.67e-05	99.9746	1.12684	0.00519
LBL	LP1_3_10CM	DP	7/18/12_7/22/12	July	Low	Center	10	Shallow	Site0GeoTransect	7.91035e+06	585388	71.2803	-156.616	4.869	30	7	47.6772		8.14493		5.95	18.8	2.39	286.4	0.0376	0.00875	0.148	0.00381	0.00486	0.00018	0.0503	0.00443	<0.00007		<0.005		0.00435	0.000495			10.6	0.275	<0.00002		0.000173	1.84e-05	93.6894	0.208918	0.00259
LBL	LP1_3_20CM	DP	7/18/12_7/22/12	July	Low	Center	20	Deep	Site0GeoTransect	7.91035e+06	585388	71.2803	-156.616			5.3	51.1407		8.90425		5.86	26.8	3.32	280	<0.02		0.237	0.0072	0.00471	0.000341	0.0687	0.0033	<0.00007		0.0482	0.0107	<0.002				12	0.244	<0.00002		0.000318	2.16e-05	90.7115	0.0121074	0.00367
LBL	LP1_4_10CM	DP	7/18/12_7/22/12	July	Low	Center	10	Shallow	Site0GeoTransect	7.91035e+06	585389	71.2803	-156.616	4.865	30	8.4	48.0748		7.40032		6	29	3.47	280	<0.07		<0.04	0	0.00305	0.000413	0.0374	0.00178	<0.0003		<0.02		<0.007				7.88	0.0934	<0.00008		0.000561	6.45e-05	84.6899	0.225291	0.00261
LBL	LP1_4_10CM	DP	7/18/12_7/22/12	July	Low	Center	10	Shallow	Site0GeoTransect	7.91035e+06	585389	71.2803	-156.616												0.0864	0.021	0.188	0.0104	0.00423	0.000644	0.0452	0.00172	<0.00007		<0.005		0.00842	0.000516			9.2	0.234	<0.00002		0.000223	2.04e-05			0.003
LBL	LP1_4_20CM	DP	7/18/12_7/22/12	July	Low	Center	20	Deep	Site0GeoTransect	7.91035e+06	585389	71.2803	-156.616			5.9	42.5108		5.721		5.9	29.2	3.51	280.8	<0.02		0.226	0.014	0.00283	0.000309	0.0719	0.00266	<0.00007		<0.005		<0.002				10.5	0.273	<0.00002		0.000244	2.98e-05	95.2496	0.732611	0.00311
LBL	LP1_5_10CM	DP	7/18/12_7/22/12	July	Low	Center	10	Shallow	Site0GeoTransect	7.91035e+06	585391	71.2803	-156.616	4.88	28	9.1	26.1567		3.44281		6.06	30.3	3.4	279.9	<0.01		0.0582	0.00288	<0.00004	0	0.0425	0.00269	<0.00007		<0.004		0.011	0.000502			8.68	0.227	<0.00002		<0.000008		105.246	0.592444	0.0024
LBL	LP1_5_20CM	DP	7/18/12_7/22/12	July	Low	Center	20	Deep	Site0GeoTransect	7.91035e+06	585391	71.2803	-156.616			6.5	88.0045		6.41665		5.6	24.1	2.92	298.7	<0.01		0.511	0.0199	0.00693	0.000335	0.076	0.000829	<0.00007		0.0497	0.00848	0.002	0.0003			13.2	0.411	<0.00002		0.000916	6.52e-05	109.066	0.571021	0.00494
LBL	LP1_6_10CM	DP	7/18/12_7/22/12	July	Low	Center	10	Shallow	Site0GeoTransect	7.91035e+06	585392	71.2803	-156.616	4.867	29	9.3	54.8165		2.70947		5.85	19.7	2.27	257.6	<0.02		0.161	0.0049	0.00385	0.000282	0.037	0.00132	<0.00007		<0.005		0.011	0.000502			8.16	0.126	<0.00002		0.000235	3.2e-05	85.6296	0.923883	0.00427
LBL	LP1_6_20CM	DP	7/18/12_7/22/12	July	Low	Center	20	Deep	Site0GeoTransect	7.91035e+06	585392	71.2803	-156.616			8.7	118.603		4.57868		5.85	30.2	3.5	346.8	<0.02		0.831	0.0453	0.011	0.000557	0.0781	0.00131	<0.00007		<0.005		<0.002				13.9	0.399	<0.00002		0.0019	0.000133	102.865	0.454943	0.00807
LBL	LP1_7_10CM	DP	7/18/12_7/22/12	July	Low	Center	10	Shallow	Site0GeoTransect	7.91035e+06	585394	71.2804	-156.615	4.869	32	10.3	25.5868		3.67414		5.49	22.9	2.5	238.4	<0.02		0.0837	0.00521	<0.00004	0	0.0466	0.000625	<0.00007		<0.005		0.0107	0.00129			7.13	0.205	<0.00002		<0.000008		85.9045	1.57476	0.00445
LBL	LP1_7_20CM	DP	7/18/12_7/22/12	July	Low	Center	20	Deep	Site0GeoTransect	7.91035e+06	585394	71.2804	-156.615												<0.07		0.992	0.116	0.00598	0.000805	0.0459	0.000545	<0.0003		<0.02		<0.007				11.7	0.118	<0.00008		0.00279	0.000145	83.7613	1.59478	0.00377
LBL	LP1_7_20CM	DP	7/18/12_7/22/12	July	Low	Center	20	Deep	Site0GeoTransect	7.91035e+06	585394	71.2804	-156.615				92.144		3.94087						<0.02		0.954	0.066	0.00706	0.000374	0.0466	0.00163	<0.00007		<0.005		<0.001				10.9	0.125	<0.00002		0.00238	0.000126			0.00346
LBL	LP1_8_10CM	DP	7/18/12_7/22/12	July	Low	Center	10	Shallow	Site0GeoTransect	7.91035e+06	585396	71.2804	-156.615	4.907	31	9.5	17.1324		1.75898		5.7	25.3	2.86	259.4	<0.02		0.184	0.00692	0.000906	0.000176	0.0544	0.00126	<0.00007		<0.005		0.0257	0.00153			8.92	0.0598	<0.00002		9.94e-05	1.64e-05	96.7662	0.494921	0.00552
LBL	LP1_8_20CM	DP	7/18/12_7/22/12	July	Low	Center	20	Deep	Site0GeoTransect	7.91035e+06	585396	71.2804	-156.615				66.2993		6.99725						<0.01		0.516	0.0179	0.00361	0.000436	0.0643	0.00409	<0.00007		0.0498	0.0125	0.00835	0.001095			14.1	0.301	<0.00002		0.000815	7.42e-05	91.2452	0.0525004	0.00371
LBL	LP1_8_20CM2	DP	7/18/12_7/22/12	July	Low	Center	20	Deep	Site0GeoTransect	7.91035e+06	585396	71.2804	-156.615				26.6698		2.41927						<0.01		0.165	0.0106	<0.00004	0	0.087	0.0038	<0.00007		<0.004		27.6	0.00187			10.9	0.369	<0.00002		0.000163	2.16e-05	97.3878	0.609768	0.00338
LBL	LP1_9_10CM	DP	7/18/12_7/22/12	July	Low	Center	10	Shallow	Site0GeoTransect	7.91035e+06	585397	71.2804	-156.615	4.963	29		47.5132		5.96477						<0.01		0.206	0.00374	0.00143	0.000317	0.0641	0.000565	<0.00007		<0.005		6.44	0.000505			10.6	0.134	<0.00002		0.000177	8.46e-06	82.565	0.494547	0.00407
LBL	LP1_9_20CM	DP	7/18/12_7/22/12	July	Low	Center	20	Deep	Site0GeoTransect	7.91035e+06	585397	71.2804	-156.615				31.3961		4.04013						<0.01		0.0786	0.00453	0.0033	0.000159	0.0648	0.00105	<0.00007		<0.005		7.97	0.000284			10.1	0.28	<0.00002		6.52e-05	1.52e-05	85.7861	0.53144	0.00524
LBL	LP2_1_20CM	DP	7/18/12_7/22/12	July	Low	Center	20	Deep	Site0GeoTransect	7.91032e+06	585389	71.2801	-156.616	5.167	27		40.7693		4.30782						<0.02		0.485	0.0262	0.00163	0.000285	0.0561	0.00136	<0.00007		<0.005		1.9	0.000472			7.87	0.132	<0.00002		0.000732	7.34e-05	65.5535	0.402381	0.00336
LBL	LP2_2_20CM	DP	7/18/12_7/22/12	July	Low	Center	20	Deep	Site0GeoTransect	7.91032e+06	585389	71.2801	-156.616	5.029	28	5.7					5.51	21.5	2.67	296.7	<0.02		0.507	0.0167	0.0121	0.000842	0.0713	0.000443	<0.00007		0.0285	0.00533	<0.002				15	0.162	<0.00002		0.00108	4.15e-05	105.57	0.49069	0.00707
LBL	LP2_2_20CM	DP	7/18/12_7/22/12	July	Low	Center	20	Deep	Site0GeoTransect	7.91032e+06	585389	71.2801	-156.616				86.1674		5.1717						<0.07		0.688	0.115	0.0125	0.000516	0.0729	0.00352	<0.0003		<0.02		<0.007				16.1	0.163	<0.00008		0.00139	9.36e-05			0.00739
LBL	LP2_3_10CM	DP	7/18/12_7/22/12	July	Low	Center	10	Shallow	Site0GeoTransect	7.91032e+06	585391	71.2801	-156.616	4.847	32	10.4	16.6644		2.97534		5.26	35.2	3.73	158.4	<0.02		0.0345	0.000612	<0.00004	0	0.0246	0.000852	<0.00007		<0.005		0.0266	0.00158			3.53	0.0953	<0.00002		<0.000008		60.294	0.138132	0.000668
LBL	LP2_3_20CM	DP	7/18/12_7/22/12	July	Low	Center	20	Deep	Site0GeoTransect	7.91032e+06	585391	71.2801	-156.616			6.6	50.439		4.99857		5.56	21.8	2.65	247.9	<0.02		0.245	0.00593	0.00487	0.000429	0.071	0.0023	<0.00007		<0.005		<0.001				10.3	0.282	<0.00002		0.000335	3.04e-05	83.2894	0.4863	0.00334
LBL	LP2_4_10CM	DP	7/18/12_7/22/12	July	Low	Center	10	Shallow	Site0GeoTransect	7.91032e+06	585392	71.2801	-156.616	4.92	29	9.7	18.3314		2.764		5.3	32.7	3.66	224	<0.01		0.0784	0.00466	0.000886	0.000126	0.0354	0.00141	<0.00007		0.154	0.0181	0.00377	0.000734			7.27	0.161	<0.00002		1.73e-05	2.75e-06	82.8422	0.603604	0.00327
LBL	LP2_4_20CM	DP	7/18/12_7/22/12	July	Low	Center	20	Deep	Site0GeoTransect	7.91032e+06	585392	71.2801	-156.616			5.8	27.0533		2.62423		5.31	13.8	1.71	255.4	<0.01		0.355	0.024	0.000742	0.000152	0.0656	0.00331	<0.00007		<0.004		<0.001				10.5	0.281	<0.00002		0.000142	1.7e-05	97.6276	0.0168876	0.00798
LBL	LP2_5_10CM	DP	7/18/12_7/22/12	July	Low	Center	10	Shallow	Site0GeoTransect	7.91032e+06	585393	71.2801	-156.616	4.985	28	9.6	52.9802		4.45383		5.35	53.2	6.04	244.7	<0.01		0.225	0.0197	0.00319	0.000338	0.0564	0.0013	<0.00006		<0.004		0.00359	0.000602			11.4	0.333	<0.00002		0.000343	3.37e-05	88.3003	1.08517	0.00558
LBL	LP2_5_20CM	DP	7/18/12_7/22/12	July	Low	Center	20	Deep	Site0GeoTransect	7.91032e+06	585393	71.2801	-156.616				111.682		3.77085						<0.01		0.761	0.0515	0.00812	0.000814	0.103	0.00423	<0.00007		0.0959	0.0251	<0.001				16.4	0.282	<0.00002		0.00181	0.000142	98.0129	0.817161	0.00816
LBL	LP2_6_10CM	DP	7/18/12_7/22/12	July	Low	Center	10	Shallow	Site0GeoTransect	7.91032e+06	585394	71.2801	-156.616	4.897	28	9.4	38.7529		5.58739		5.7	37.9	4.27	285.2	0.0875	0.0179	0.0632	0.0019	0.00235	0.000349	0.0219	0.000923	<0.00007		<0.005		0.0276	0.00187			8.23	0.15	<0.00002		7.09e-05	1.76e-05	78.1602	0.202768	0.00235
LBL	LP2_6_20CM	DP	7/18/12_7/22/12	July	Low	Center	20	Deep	Site0GeoTransect	7.91032e+06	585394	71.2801	-156.616			6.1	175.777		4.90665		5.91	18.8	2.28	402.5	<0.02		0.94	0.0353	0.0466	0.000417	0.0897	0.00504	<0.00007		0.0998	0.0105	0.00674	0.000579			16.7	0.0822	0.000252	4.59e-05	0.00282	9.8e-05	76.9101	0.0741065	0.0113
LBL	LP2_7_10CM	DP	7/18/12_7/22/12	July	Low	Center	10	Shallow	Site0GeoTransect	7.91032e+06	585395	71.2801	-156.615	4.872	34	10.5	31.0634		3.74218		5.42	38.7	4.29	191.3	<0.06		<0.03	0	0.00133	0.000305	0.0678	0.0018	<0.0003		<0.02		<0.006				8.61	0.0989	<0.00007		0.000489	6.59e-05	83.7394	0.45236	0.00264
LBL	LP2_7_10CM	DP	7/18/12_7/22/12	July	Low	Center	10	Shallow	Site0GeoTransect	7.91032e+06	585395	71.2801	-156.615												<0.02		0.15	0.00385	0.00135	0.000152	0.0688	0.00288	<0.00008		0.268	0.0462	0.0588	0.00102			8.89	0.117	<0.00002		0.00016	1.53e-05			0.00331
LBL	LP2_7_10CM2	DP	7/18/12_7/22/12	July	Low	Center	10	Shallow	Site0GeoTransect	7.91032e+06	585395	71.2801	-156.615				22.988		4.66153						<0.02		0.0856	0.00462	0.000992	0.000251	0.05	0.00179	<0.00007		<0.005		0.0511	0.0016			8.95	0.221	<0.00002		0.000103	1.75e-05	64.547	0.600508	0.00211
LBL	LP2_7_20CM	DP	7/18/12_7/22/12	July	Low	Center	20	Deep	Site0GeoTransect	7.91032e+06	585395	71.2801	-156.615			6.6	214.809		15.2104		5.99	22.2	2.87	461.6	<0.01		1.72	0.0449	0.0754	0.00322	0.138	0.00643	<0.00007		0.258	0.0189	<0.001				26.5	0.982	0.000408	9.02e-05	0.00838	0.000156	65.6244	0.284005	0.0198
LBL	LP2_8_10CM	DP	7/18/12_7/22/12	July	Low	Center	10	Shallow	Site0GeoTransect	7.91033e+06	585396	71.2801	-156.615	4.912	31	8.4	35.8488		3.74324		5.49	26.1	2.98	262.7	<0.01		0.0938	0.00759	0.0015	0.000253	0.0561	0.00261	<0.00007		<0.004		0.0199	0.00078			9.45	0.148	<0.00002		6.8e-05	9.23e-06	87.5374	0.293453	0.00289
LBL	LP2_8_20CM	DP	7/18/12_7/22/12	July	Low	Center	20	Deep	Site0GeoTransect	7.91033e+06	585396	71.2801	-156.615			6.2	249.593		2.95596		5.67	17.3	2.08	348.6	0.212	0.0255	2	0.18	0.0969	0.00433	0.114	0.00349	<0.00007		0.0987	0.00722	<0.002				20.5	0.196	<0.00002		0.00428	5.76e-05	74.6868	0.357212	0.0211
LBL	LP2_8_20CM2	DP	7/18/12_7/22/12	July	Low	Center	20	Deep	Site0GeoTransect	7.91033e+06	585396	71.2801	-156.615				215.251		3.42671						<0.01		1.4	0.0641	0.0735	0.00385	0.121	0.00568	<0.00007		0.205	0.0237	<0.001				19	0.505	0.000445	8.69e-05	0.00325	0.000293	76.1582	0.0526477	0.0116
LBL	LP2_9_10CM	DP	7/18/12_7/22/12	July	Low	Center	10	Shallow	Site0GeoTransect	7.91033e+06	585398	71.2802	-156.615	4.974	31	8.4	60.5989		5.88556		5.72	16.5	1.9	258.6	<0.02		0.481	0.0224	0.011	0.000571	0.0814	0.00443	<0.00007		<0.005		0.028	0.00101			11.5	0.409	<0.00002		0.00178	0.000115	81.7951	0.380938	0.00313
LBL	LP2_9_20CM	DP	7/18/12_7/22/12	July	Low	Center	20	Deep	Site0GeoTransect	7.91033e+06	585398	71.2802	-156.615			7.2	91.3852		7.20394		5.68	15.7	1.85	303.3	<0.01		0.709	0.0369	0.0129	0.000577	0.081	0.00162	<0.00007		0.102	0.0129	0.0118	0.00164			13.7	0.336	0.000173	4.09e-05	0.00128	0.000141	76.8523	1.07814	0.00537
LBL	LP2_10_10CM	DP	7/18/12_7/22/12	July	Low	Center	10	Shallow	Site0GeoTransect	7.91033e+06	585399	71.2802	-156.615	4.937	28	9.8					5.54	25.8	2.89	226.7	<0.06		<0.03	0	<0.00002	0	0.0354	0.00198	<0.0003		<0.02		<0.006				7.52	0.103	<0.00007		0.000408	7.8e-05	85.0715	0.176437	0.00291
LBL	LP2_10_10CM	DP	7/18/12_7/22/12	July	Low	Center	10	Shallow	Site0GeoTransect	7.91033e+06	585399	71.2802	-156.615				21.5257		4.63061						0.121	0.0272	0.0775	0.00991	0.000896	0.000145	0.0363	0.00062	<0.00007		<0.005		0.0805	0.000653			7.66	0.174	0.000218	5.26e-05	9.56e-05	1.37e-05			0.00282
LBL	LP2_10_20CM	DP	7/18/12_7/22/12	July	Low	Center	20	Deep	Site0GeoTransect	7.91033e+06	585399	71.2802	-156.615			7.4	78.2138		4.15265		5.75	13.4	1.6	318.1	<0.01		0.433	0.036	0.0157	0.00116	0.0591	0.00397	<0.00007		<0.005		<0.001				12.2	0.171	<0.00002		0.00076	7.43e-05	87.691	1.41411	0.0049
LBL	LP2_11_10CM	DP	7/18/12_7/22/12	July	Low	Center	10	Shallow	Site0GeoTransect	7.91033e+06	585400	71.2802	-156.615	5.073			70.0176		1.91836						<0.02		0.442	0.0427	0.00465	0.000259	0.0614	0.0026	<0.00007		0.042	0.0073	0.00466	0.000805			9.22	0.41	<0.00002		0.000891	2.19e-05	78.3463	0.708888	0.00287
LBL	LP2_11_20CM	DP	7/18/12_7/22/12	July	Low	Center	20	Deep	Site0GeoTransect	7.91033e+06	585400	71.2802	-156.615		26	6.8	96.2646		5.24855		5.45	26.6	3.21	228.3	<0.01		0.51	0.0233	0.00776	0.000434	0.0541	0.00168	<0.00006		<0.004		<0.001				12.4	0.41	<0.00001		0.000855	2e-05	73.3118	6.28074	0.00605
LBL	LP3_1_20CM	DP	7/18/12_7/22/12	July	Low	Rim	20	Deep	Site0GeoTransect	7.91031e+06	585400	71.28	-156.615	5.238	24		51.8484		5.68236						<0.02		1.54	0.0623	0.00146	0.000231	0.0908	0.00362	0.00014	3.71e-05	<0.005		0.07	0.0023			16.6	0.159	<0.00002		0.002	0.000141	95.3833	5.30171	0.00747
LBL	LP_3_2_20CM	DP	7/18/12_7/22/12	July	Low	Trough	20	Deep	Site0GeoTransect	7.91031e+06	585402	71.28	-156.615	5.139	24		57.8366		3.39873						<0.02		0.946	0.0251	0.00111	0.00014	0.139	0.00217	<0.00007		<0.005		0.0332	0.00067			15.1	0.378	0.000251	6.48e-05	0.0016	4.58e-05	102.986	0.207544	0.0187
LBL	LP3_3_20CM	DP	7/18/12_7/22/12	July	Low	Trough	20	Deep	Site0GeoTransect	7.91031e+06	585404	71.28	-156.615	4.936	28		502.775		2.56684						0.155	0.0299	3.42	0.101	0.0186	0.00104	0.142	0.00211	0.000564	0.000118	0.322	0.0295	0.00962	0.000852			18.7	0.767	0.000394	8.64e-05	0.0168	0.000805	85.2703	0.361266	0.0141
LBL	LP3_4_10CM	DP	7/18/12_7/22/12	July	Low	Trough	10	Shallow	Site0GeoTransect	7.91031e+06	585405	71.28	-156.615	4.83	32	4.8	661.832		12.6851		5.08	11.2	1.43	302.7	<0.01		0.186	0.0058	0.0134	0.00142	0.0583	0.00289	<0.00007		<0.004		<0.001				17.3	0.325	<0.00002		0.000515	4.73e-05	65.1744	0.252075	0.0113
LBL	LP3_4_20CM	DP	7/18/12_7/22/12	July	Low	Trough	20	Deep	Site0GeoTransect	7.91031e+06	585405	71.28	-156.615			4.5	1193.1		2.08223		5.13	8.9	1.12	438.2	<0.01		0.651	0.0262	0.0141	0.00139	0.0979	0.00349	<0.00007		0.019	0.00452	<0.001				18.3	1.58	<0.00002		0.000986	9.38e-05	80.8326	0.352303	0.0138
LBL	LP3_5_10CM	DP	7/18/12_7/22/12	July	Low	Trough	10	Shallow	Site0GeoTransect	7.9103e+06	585407	71.28	-156.615	4.747	35	5.7	209.041		6.27082		5.92	34.7	4.25	266.2	<0.01		0.377	0.00584	0.00859	0.000468	0.0524	0.000992	<0.00007		<0.005		<0.001				14.7	0.132	<0.00002		0.0011	4.19e-05	81.7799	0.331753	0.00875
LBL	LP3_5_20CM	DP	7/18/12_7/22/12	July	Low	Trough	20	Deep	Site0GeoTransect	7.9103e+06	585407	71.28	-156.615			5	532.366		7.56878		5.98	19.7	2.5	347.5	<0.02		2.5	0.132	0.0255	0.00109	0.19	0.0165	0.000367	9.59e-05	0.182	0.0269	0.0276	0.00187			30.1	0.853	<0.00002		0.01	0.00049	83.1556	0.572148	0.0239
LBL	LP3_6_10CM	DP	7/18/12_7/22/12	July	Low	Trough	10	Shallow	Site0GeoTransect	7.9103e+06	585408	71.28	-156.615	4.794	34	4.8	288.093		3.98456		5.08	14.9	1.9	284.5	<0.02		0.432	0.0208	0.0149	0.000496	0.0588	0.00239	<0.00007		<0.005		0.0147	0.00189			17.5	0.458	<0.00002		0.00145	0.000113	80.5819	0.255631	0.0121
LBL	LP3_6_20CM	DP	7/18/12_7/22/12	July	Low	Trough	20	Deep	Site0GeoTransect	7.9103e+06	585408	71.28	-156.615			3.7	379.528		8.83363		5.68	7.1	0.92	303.1	<0.01		1.45	0.0582	0.0229	0.00119	0.138	0.00216	0.000297	3.53e-05	0.161	0.0181	<0.004				24.9	0.654	<0.00002		0.00642	0.000315	87.0189	1.1341	0.0331
LBL	LP3_7_10CM	DP	7/18/12_7/22/12	July	Low	Trough	10	Shallow	Site0GeoTransect	7.9103e+06	585410	71.2799	-156.615	4.865	33	5	124.263		2.85121		5.59	35.9	4.56	218.8	0.0452	0.00856	0.314	0.0104	0.0049	0.000289	0.0491	0.00127	<0.00007		0.0958	0.0137	0.00647	0.000507			9.73	0.116	<0.00002		0.000933	5.54e-05	76.4661	0.281314	0.014
LBL	LP3_7_20CM	DP	7/18/12_7/22/12	July	Low	Trough	20	Deep	Site0GeoTransect	7.9103e+06	585410	71.2799	-156.615			4.4	259.919		7.21494		5.45	16.7	2.14	140	0.0594	0.014	0.933	0.0683	0.0141	0.00113	0.0726	0.00585	<0.00007		0.0598	0.0141	<0.001				15.9	0.339	<0.00002		0.00212	0.000117	91.3092	0.64319	0.0137
LBL	LP3_8_10CM	DP	7/18/12_7/22/12	July	Low	Trough	10	Shallow	Site0GeoTransect	7.9103e+06	585412	71.2799	-156.615	4.877	30	4.9	144.39		2.45869		5.45	10.4	1.31	203.3	<0.01		0.369	0.0203	0.00632	0.000817	0.0398	0.00123	<0.00007		0.0222	0.00351	0.00269	0.000374			9.85	0.2	<0.00002		0.000532	3.41e-05	70.3663	0.537839	0.00619
LBL	LP3_8_20CM	DP	7/18/12_7/22/12	July	Low	Trough	20	Deep	Site0GeoTransect	7.9103e+06	585412	71.2799	-156.615			4.1	191.936		7.78121		5.44	9.3	1.2	225.3	<0.02		0.876	0.0194	0.00894	0.000447	0.0638	0.00206	<0.00007		0.0514	0.0104	<0.001				13.5	0.349	<0.00002		0.00144	7.43e-05	71.7843	0.498706	0.00857
LBL	LP3_9_10CM	DP	7/18/12_7/22/12	July	Low	Trough	10	Shallow	Site0GeoTransect	7.9103e+06	585413	71.2799	-156.615	4.86	29	5	161.339		3.02652		5.62	13.8	1.69	238.1	<0.01		0.322	0.013	0.00745	0.000579	0.0443	0.00105	<0.00007		0.0277	0.00519	<0.005				10.6	0.237	<0.00002		0.000355	3.78e-05	79.6717	1.57125	0.00586
LBL	LP3_9_20CM	DP	7/18/12_7/22/12	July	Low	Trough	20	Deep	Site0GeoTransect	7.9103e+06	585413	71.2799	-156.615			5.2	236.246		8.60391		5.58	9.9	1.25	277.4	<0.01		0.876	0.0116	0.0133	0.00109	0.0769	0.00299	<0.00007		0.0459	0.0118	<0.004				15.7	0.319	<0.00002		0.00107	7.73e-05	82.6069	0.659387	0.00858
LBL	LP3_10_10CM	DP	7/18/12_7/22/12	July	Low	Trough	10	Shallow	Site0GeoTransect	7.9103e+06	585415	71.2799	-156.615	4.777	32	6.1	93.0716		6.5729		5.48	25.7	3.17	173.6	<0.01		0.189	0.0039	0.00376	0.000441	0.0325	0.00168	<0.00007		<0.005		0.02105	0.002685			7.14	0.135	<0.00002		0.000214	2.94e-05	70.0624	0.464371	0.00566
LBL	LP3_10_20CM	DP	7/18/12_7/22/12	July	Low	Trough	20	Deep	Site0GeoTransect	7.9103e+06	585415	71.2799	-156.615			5.1	210.803		6.07032		5.6	7.4	0.93	283.6	<0.02		0.785	0.0447	0.0103	0.000743	0.0864	0.00214	<0.00007		0.0741	0.0115	<0.001				15.7	0.323	<0.00002		0.00119	0.000256	90.3805	0.726336	0.00931
LBL	LP3_11_10CM	DP	7/18/12_7/22/12	July	Low	Trough	10	Shallow	Site0GeoTransect	7.9103e+06	585416	71.2799	-156.615	4.831	31	6.3	63.3231		6.44205		5.55	26.3	3.21	207.8	<0.01		0.129	0.00715	0.00216	0.000519	0.0241	0.00164	<0.00007		0.0321	0.00828	<0.001				6.15	0.203	<0.00002		0.000143	1.61e-05	66.2582	0.821668	0.0033
LBL	LP3_11_20CM	DP	7/18/12_7/22/12	July	Low	Trough	20	Deep	Site0GeoTransect	7.9103e+06	585416	71.2799	-156.615			5.1	173.908		6.18368		5.58	12.2	1.55	148.6	<0.01		0.766	0.052	0.00823	0.000524	0.0818	0.00291	<0.00007		0.0444	0.00881	<0.001				15.3	0.192	<0.00002		0.00134	3.98e-05	90.4393	0.052825	0.00813
LBL	LP3_12_10CM	DP	7/18/12_7/22/12	July	Low	Trough	10	Shallow	Site0GeoTransect	7.9103e+06	585418	71.2799	-156.615	4.951			82.791		2.34968						0.0978	0.0105	0.198	0.00934	0.00317	0.000361	0.0285	0.000529	<0.00007		0.146	0.0352	0.00272	0.000683			6.92	0.152	<0.00002		0.000186	1.53e-05	58.9186	1.48034	0.00348
LBL	LP3_12_20CM	DP	7/18/12_7/22/12	July	Low	Trough	20	Deep	Site0GeoTransect	7.9103e+06	585418	71.2799	-156.615		28	4.1	110.754		7.07206		5.49	15.6	2.02	116.3	<0.01		0.604	0.0267	0.00935	0.000522	0.0494	0.00297	<0.00007		0.035	0.0052	0.0274	0.00348			12.6	0.467	<0.00002		0.00138	8.55e-05	71.1579	0.145177	0.00514
LBL	LP3_13_20CM	DP	7/18/12_7/22/12	July	Low	Trough	20	Deep	Site0GeoTransect	7.9103e+06	585420	71.2799	-156.615	5.095	26	4.6	99.1074		2.6632		5.45	29.8	3.8	171.2	<0.01		1.04	0.0449	0.0137	0.000952	0.0736	0.00215	<0.00007		<0.004		0.011	0.000502			11.7	0.335	<0.00002		0.00212	0.000131	94.1408	0.444522	0.00793
LBL	TP1_1_20CM	DP	7/18/12_7/22/12	July	Low	Rim	20	Deep	Site0GeoTransect	7.91028e+06	585420	71.2798	-156.615	4.943	29	4.9	49.2777		6.35578		6.09	15.9	2.01	245.5	<0.01		0.112	0.0043	0.00145	0.000293	0.0804	0.00496	<0.00007		0.0724	0.0102	<0.001				16	0.144	<0.00002		0.000129	2.04e-05	123.235	0.519783	0.0181
LBL	TP1_2_20CM	DP	7/18/12_7/22/12	July	Low	Rim	20	Deep	Site0GeoTransect	7.91028e+06	585422	71.2798	-156.615	4.911	28	4.6	72.6847		17.7787		6.4	14	1.79	497.6	<0.01		0.075	0.00421	0.00362	0.000326	0.0532	0.00217	<0.00007		<0.005		<0.001				19.3	0.559	<0.00002		0.000284	2.32e-05	75.9262	0.0792272	0.00846
LBL	TP1_3_18CM	DP	7/18/12_7/22/12	July	Low	Rim	18	Deep	Site0GeoTransect	7.91028e+06	585423	71.2798	-156.615	5.1	25	4.8	92.4662		3.14849		5.52	19.5	2.48	215.3	<0.01		0.402	0.0152	0.00934	0.000293	0.0462	0.00136	<0.00007		<0.004		0.0105	0.000669			11.7	0.0991	<0.00002		0.00106	6.75e-05	81.9358	0.505968	0.00743
LBL	TP2_1_25CM	DP	7/18/12_7/22/12	July	High-tranisitonal	Trough	25	Deep	Site0GeoTransect	7.91022e+06	585451	71.2792	-156.614	4.913	31		54.5233		3.50671						0.628	0.15	46.6	3.51	0.00911	0.00146	0.58	0.0249	<0.0002		0.501	0.0698	0.0731	0.00738			11.7	0.259	<0.00005		0.0161	0.000716	53.899	0.218343	0.0108
LBL	TP2_2_15CM	DP	7/18/12_7/22/12	July	High-transitional	Rim	15	Deep	Site0GeoTransect	7.91022e+06	585452	71.2792	-156.614	5.098	25		55.7199		3.40745						<0.01		0.73	0.0196	0.000958	0.000144	0.0423	0.00203	<0.00007		<0.005		0.0197	0.00116			8.31	0.219	<0.00002		0.000907	4.63e-05	40.5659	0.010699	0.00336
LBL	HP1_1_18CM	DP	7/18/12_7/22/12	July	High	Trough	18	Deep	Site0GeoTransect	7.91015e+06	585483	71.2786	-156.613	4.702	25		174.988		2.3329						0.105	0.0258	1.73	0.068	0.00264	0.000301	0.0878	0.00285	<0.00007		0.173	0.0178	<0.002				12	0.205	<0.00002		0.00518	0.000339	66.742	0.619144	0.0074
LBL	HP3_1_20CM	DP	7/18/12_7/22/12	July	High	Trough	20	Deep	Site0GeoTransect	7.91013e+06	585495	71.2783	-156.613	4.619	25		177.792		10.2029						<0.02		1.99	0.1	0.00376	0.000283	0.134	0.00399	0.000514	0.000126	0.207	0.0204	<0.001				15.8	0.197	<0.00002		0.00716	0.00043	65.6019	0.363321	0.0134
LBL	HP3_2_20CM	DP	7/18/12_7/22/12	July	High	Trough	20	Deep	Site0GeoTransect	7.91013e+06	585496	71.2783	-156.613	4.672	26		232.17		18.1139						<0.02		2.42	0.133	0.0231	0.000811	0.137	0.00398	0.000339	8.83e-05	0.27	0.0254	0.0151	0.000428			23.5	0.517	<0.00002		0.0111	0.000273	70.7268	1.49862	0.0196
LBL	HP4_1_20CM	DP	7/18/12_7/22/12	July	High	Trough	20	Deep	Site0GeoTransect	7.91008e+06	585517	71.278	-156.612	4.57	30		128.048		3.99738						0.0649	0.00679	1.43	0.0489	0.00119	0.00023	0.0946	0.00236	<0.00007		0.0632	0.014	0.00294	0.000465			9.5	0.322	<0.00002		0.00396	0.000315	61.0466	0.0674619	0.00533
LBL	HP4_2_20CM	DP	7/18/12_7/22/12	July	High	Trough	20	Deep	Site0GeoTransect	7.91008e+06	585518	71.2779	-156.612	4.55	28		232.658		17.2906						0.153	0.0136	2.53	0.124	0.00243	0.00039	0.16	0.00725	<0.00007		<0.005		0.00771	0.0011			17.8	0.301	0.000387	8.41e-05	0.00914	0.000477	55.5913	0.276654	0.0169
LBL	HP5_1_17CM	DP	7/18/12_7/22/12	July	High	Trough	17	Deep	Site0GeoTransect	7.91e+06	585559	71.2772	-156.611	4.897	24		81.0759		3.2214						<0.01		2.92	0.176	0.00113	0.000227	0.0861	0.00283	<0.00007		0.0349	0.00782	0.0357	0.000428			10.2	0.24	<0.00002		0.0017	0.000308	42.9727	0.881717	0.004
LBL	HP5_2_15CM	DP	7/18/12_7/22/12	July	High	Center	15	Deep	Site0GeoTransect	7.91e+06	585559	71.2772	-156.611	5.044	21		41.054		5.48481						0.134	0.0359	0.372	0.0329	0.00144	0.000322	0.0595	0.00103	<0.00007		<0.004		0.0134	0.000735			14.5	0.302	<0.00002		0.000704	4.47e-05	54.5507	0.288036	0.00225
LBL	HP6_1_20CM	DP	7/18/12_7/22/12	July	High	Trough	20	Deep	Site0GeoTransect	7.90997e+06	585572	71.2769	-156.611	5.017	26		59.6096		3.1457						0.101	0.0261	3.58	0.193	0.00127	0.000183	0.152	0.00459	<0.00007		<0.004		0.0125	0.000546			8.54	0.248	<0.00002		0.00321	0.000369	46.5237	0.225878	0.00454
LANL	NG_12-8_1	Surface	2012-08-05	Aug	High-transitional	Trough	0	Surface	C	7.91031e+06	585910	71.2798	-156.601			12.79	95.47	139.97		6.74	6.23	70.1	7.38	318.2			0.0532329	0.000461441	0.0052799	1.33e-05	0.702213	0.0140032	<0.001				0.138427	0.00148291	<0.01		10.8384	0.0957182	<0.001				65.8314		0.0094702
LANL	NG_12-8_2	DP	2012-08-06	Aug	Low	Center	7.62	Shallow	D	7.91057e+06	585926	71.2821	-156.6			5.39	42.26	62.74		5.018	5.84	4.6	0.58	481.8			0.0858418	0.000877506	0.0056022	0.0001247	0.446373	0.00388279	<0.001				0.0946655	0.000921688	<0.01		11.0998	0.0527293	<0.001				121.939		0.0065288
LANL	NG_12-8_3	Surface	2012-08-06	Aug	Low	Center	0	Surface	D	7.91055e+06	585942	71.282	-156.6			11.66	17.99	23.9		5.377	4.9	61.2	6.51	346.9			<0.001		0.0006626	1.09e-05	0.422566	0.000975972	<0.001				0.112936	0.00147878	<0.01		6.88162	0.0224978	<0.001				100.473		0.0021558
LANL	NG_12-8_4	DP	2012-08-06	Aug	Low	Pond	7.62	Shallow	D	7.91056e+06	585931	71.282	-156.6				129.95	171.59		5.437	5.98						0.133739	0.00207356	0.0081887	7.79e-05	0.772377	0.00481243	<0.001				0.165681	0.00282943	<0.01		18.5369	0.205178	<0.001				107.09		0.0182242
LANL	NG_12-8_5	DP	2012-08-06	Aug	High-transitional	Trough	7.62	Shallow	C	7.91042e+06	585936	71.2808	-156.6			8.68	176.85	259.54		5.956	5.86	5.9	0.7	585.2			0.962986	0.00942393	0.0128012	0.0001588	1.09871	0.0205037	<0.001				0.239473	0.000655749	0.0700903		19.6953	0.0409003	0.0011896	1.33e-05			110.291		0.020398
LANL	NG_12-8_6	DP	2012-08-07	Aug	High	Trough	7.62	Shallow	B	7.9103e+06	585799	71.2798	-156.604			6.46	84.91	103		5.87	5.73	29.1	3.63	386.3			0.220744	0.00157607	0.0024441	1.15e-05	0.29644	0.00159772	<0.001				0.0734479	0.000118662	<0.01		9.2742	0.0227359	0.0013779	2.02e-05			90.2689		0.0080785
LANL	NG_12-8_7	Surface	2012-08-07	Aug	High-transitional	Trough	0	Surface	B	7.91028e+06	585838	71.2796	-156.603			8.16	34.01	50.5		4.565	5	87.4	10.35	323.8			0.0453523	0.000529624	0.001832	1.45e-05	0.280907	0.000684944	<0.001				0.108939	0.00096073	0.102158		8.09657	0.0727906	0.001734	3.11e-05			90.8733		0.006817
LANL	NG_12-8_8	DP	2012-08-07	Aug	Low	Trough	7.62	Shallow	A	7.91049e+06	585541	71.2816	-156.611			5.08	76.6	64.2		5.106	5.52	15.8	1.89	320.6			0.0655159	0.000646594	0.0034412	5.49e-05	0.352527	0.00350519	<0.001				0.0888223	0.000573427	0.0518429		5.46315	0.080919	<0.001				75.8498		0.0037919
LANL	NG_12-8_9	Surface	2012-08-07	Aug	Low	Center	0	Surface	A	7.91048e+06	585532	71.2815	-156.611			7.9	21.866	13.79		5.1498	5.08	53.7	6.6	256.7			0.00928324	5.16541e-05	0.0014167	7.03e-05	0.193865	0.000511	<0.001				0.0564236	7.04034e-05	<0.01		4.27075	0.0359939	<0.001				72.8104		0.0013837
LANL	NG_12-8_10	DP	2012-08-07	Aug	Low	Center	7.62	Shallow	A	7.91049e+06	585534	71.2815	-156.611			6.48	75.81	56.67		5.189	5.34	55.6	6.83	260.2			0.136342	0.00141073	0.004299	0.0001259	0.242464	0.00129997	<0.001				0.097977	0.00140838	0.0362951		5.4185	0.040219	<0.001				71.2975		0.0031875
LANL	NG_12-9_1	Surface	2012-09-12	Sept	Low	Trough	0	Surface	A	7.9105e+06	585538	71.2816	-156.611			3.65	45.73			4.346	4.98	65.5	8.55	255			0.0444166	0.0002768	0.0015237	1.46e-05	0.0093144	0.0002029	<0.001				0.0754061	0.000547019	<0.01		5.12544	0.036236	<0.001				70.4127		0.0023108
LANL	NG_12-9_2	DP	2012-09-12	Sept	Low	Center	7.62	Shallow	A	7.91049e+06	585536	71.2815	-156.611			3.33	87.46	75.83		5.598	5.71	27.4	10.7	349.9			0.374904	0.0038068	0.0095515	4.72e-05	0.0275516	0.0003259	<0.001				0.0569437	0.000675173	<0.01		7.01763	0.0567258	<0.001				69.2758		0.0049642
LANL	NG_12-9_3	DP	2012-09-12	Sept	Low	Trough	7.62	Shallow	A	7.91049e+06	585541	71.2816	-156.611														0.490017	0.0136091	0.0029642	0.0005619	0.0786093	0.0010021	<0.01				0.0465012	0.00313983	<0.01		7.6113	0.0943062	<0.01				73.2092		<0.01
LANL	NG_12-9_4	Wick	2012-09-13	Sept	High	Center	20.32	Deep	C	7.91042e+06	585940	71.2808	-156.6				36.79	39.63		6.65							0.552403	0.0001825	0.0012627	3.45e-05	0.0121552	0.000182	<0.001				1.24747	0.0053984	<0.01		13.1045	0.0890478	<0.001				46.1656		0.0031583
LANL	NG_12-9_5	Wick	2012-09-13	Sept	High	Center	5.08	Shallow	C	7.91041e+06	585942	71.2808	-156.6				13.09	40.98		7.343							0.118716	0.0002081	0.0017637	1.8e-05	0.0086647	0.0001229	<0.001				3.22191	0.011054	<0.01		19.9357	0.0712234	<0.001				83.1515		0.0029212
LANL	NG_12-9_6	Surface	2012-09-13	Sept	High-transitional	Trough	0	Surface	C	7.91042e+06	585934	71.2808	-156.6			2.09	40.03	55.67		6.031	5.93	69.6	9.45	286.9			0.0612211	7.52e-05	0.0013448	1.7e-06	0.0144507	0.0001282	<0.001				0.0550815	0.000278994	<0.01		7.64581	0.0285267	<0.001				74.6659		0.0024353
LANL	NG_12-9_7	DP	2012-09-13	Sept	High-transitional	Trough	25.4	Deep	C	7.91042e+06	585935	71.2808	-156.6			2.54	164.37	212.36		6.411	5.47	15.5	2.07	440			0.549533	0.0036539	0.0060648	3.93e-05	0.073477	0.001306	<0.001				0.0697402	0.00120707	<0.01		18.2746	0.200243	<0.001				80.9089		0.0166808
LANL	NG_12-9_8	Wick	2012-09-13	Sept	High	Center	5.08	Shallow	B	7.91024e+06	585878	71.2792	-156.602				29.67	40.27		6.764							0.213057	0.0014384	0.0012053	5.62e-05	0.0122169	0.0001913	<0.001				1.4111	0.0134581	<0.01		12.3833	0.0568396	<0.001				55.7852		0.002657
LANL	NG_12-9_9	Wick	2012-09-13	Sept	High	Center	20.32	Deep	B	7.91024e+06	585878	71.2792	-156.602				17.63	47.63		6.816							0.257616	0.0273962	0.0011002	2.99e-05	0.0023491	1.82e-05	<0.001				1.29579	0.0166457	<0.01		17.5869	0.0906647	<0.001				53.6569		0.0051664
LANL	NG_12-9_10	DP	2012-09-13	Sept	High-transitional	Trough	7.62	Shallow	C	7.91042e+06	585935	71.2808	-156.6			2.59		180.094		6.209	5.62	11.9	1.62	479.36			0.346792	0.0012308	0.004667	2.48e-05	0.0557189	0.0001063	<0.001				0.0650022	0.000763121	<0.01		17.1066	0.115631	<0.001				81.7025		0.0141985
LANL	NG_12-9_11	DP	2012-09-14	Sept	LC	Pond	7.62	Shallow	D	7.91056e+06	585935	71.2821	-156.6			1.66		34.81		4.269	5.54	74.8	10.36	381.1			0.0496969	0.0009574	0.0016603	0.0001386	0.0190746	7.47e-05	<0.001				0.182242	0.000804173	<0.01		19.3135	0.0546789	<0.001				92.9649		0.0062839
LANL	NG_12-9_12	Surface	2012-09-14	Sept	Low	Center	0	Surface	D	7.91057e+06	585922	71.2822	-156.601			2.25	21.933	16.45		5.103	5.03	47.9	6.55	280.6			0.0244318	1.9e-06	0.0009486	3.22e-05	0.0132044	2.42e-05	<0.001				0.0628616	0.000479336	<0.01		5.37669	0.0267858	<0.001				78.3214		0.0026911
LANL	NG_12-9_13	DP	2012-09-14	Sept	Low	Center	7.62	Shallow	D	7.91057e+06	585931	71.2822	-156.6			1.91	67.81	71.89		5.626	5.8	7.6	1.11	536.5			0.124028	0.0019011	0.0074504	9.37e-05	0.042261	6.79e-05	<0.001				0.0537959	0.000416024	<0.01		13.0079	0.0239478	<0.001				114.686		0.007253
LANL	NG_12-9_14	DP	2012-09-14	Sept	High	Trough	7.62	Shallow	B	7.91023e+06	585881	71.2791	-156.602			3.01	261.59	260		5.976	5.5	17	2.23	441			1.25919	0.0006861	0.0142054	5e-05	0.0982805	0.000610248	<0.001				0.0617767	0.000538261	<0.01		22.9605	0.0767894	<0.001				61.5023		0.0226798
LANL	NG_12-9_15	Surface	2012-09-14	Sept	High	Trough	0	Surface	B	7.91023e+06	585882	71.2791	-156.602			2.73	78.57	76.4		5.725	5.71	112.4	15.18	261.1			0.150905	0.0005776	0.0018563	3.3e-05	0.0176389	6e-06	<0.001				0.065956	0.000684384	<0.01		8.74475	0.0614082	<0.001				65.3433		0.0052351
LANL	NG_12-9_16	DP	2012-09-14	Sept	drainage	small_drainage	7.62	Shallow	r	7.91005e+06	586015	71.2775	-156.598			1.64	49.94	38.44		5.818	5.52	37	2.41	5766			0.0236024	0.0001364	0.0218038	0.0006345	0.935418	0.0106493	<0.001				0.0552689	0.000418062	<0.01		328.503	2.30957	<0.001				2308.84		0.0672751
LANL	NG_12-9_17	Surface	2012-09-14	Sept	drainage	small_drainage	0	Surface	r	7.91005e+06	586016	71.2775	-156.598				34.98	29.94		6.143							0.0628444	0.0006682	0.0092071	0.0001387	0.609818	0.00145967	<0.001				0.0724551	0.000148216	<0.01		110.083	0.205749	<0.001				898.6		0.0879388
LANL	NG_12-8_11	Surface	2012-08-06	Aug	drainage	Estuarine	0	Surface	estuary	7.91101e+06	587255	71.2856	-156.563				3.639	2.754		7.581							0.0030943	3.18e-05	0.147209	0.0004398	0.0174151	0.000160739	<0.001				0.745473	0.00311292	<0.01		74.1988	0.721753	<0.001				5282.6		0.006143
LANL	NG_12-8_12	Surface	2012-08-06	Aug	drainage	Estuarine	0	Surface	estuary	7.91025e+06	586823	71.279	-156.576				3.076	4.708		7.928							<0.001		0.0603205	0.0009431	0.0348338	0.000238825	<0.001				1.45577	0.0123147	<0.01		111.505	2.21547	<0.001				8116.12		0.0011278
LANL	NG_12-8_13	Surface	2012-08-07	Aug	drainage	Estuarine	0	Surface	estuary	7.9101e+06	586553	71.2777	-156.583				4.859	4.442		8.18							0.0013924	2.1e-06	0.0969361	0.0009395	0.102746	0.00110804	<0.001				3.9004	0.0615938	<0.01		293.47	3.80011	<0.001				18781.5		0.0031684
LANL	NG_12-8_14	Surface	2012-08-07	Aug	drainage	River	0	Surface	Southern_Drainage	7.91007e+06	586478	71.2775	-156.586				12.544	12.79		6.523							0.0018067	3.18e-05	0.0009342	1.05e-05	0.0275814	0.000145413	<0.001				0.0384726	0.000311635	<0.01		8.9093	0.014589	<0.001				69.7902		<0.001
LANL	NG_12-8_15	Surface	2012-08-07	Aug	drainage	River	0	Surface	Southern_Drainage	7.91003e+06	586263	71.2772	-156.592				18.177	22.203		6.077							0.0015604	0.0003221	0.0009255	2.07e-05	0.0257492	0.000261193	<0.001				0.027619	0.000517163	<0.01		7.84235	0.0722775	<0.001				53.87		<0.001
LANL	NG_12-8_16	Surface	2012-08-07	Aug	drainage	River	0	Surface	Southern_Drainage	7.90988e+06	585689	71.276	-156.608				18.26	11.777		6.441							0.0028471	0.0002516	0.0008155	9.94e-05	0.0276279	5.3528e-05	<0.001				0.0260615	0.000149442	<0.01		5.61429	0.0152214	<0.001				57.4396		<0.001
LANL	NG_12-8_17	Surface	2012-08-06	Aug	drainage	River	0	Surface	Northern drainage	7.91134e+06	586171	71.2889	-156.593				12.151	10.878		5.079							0.0125739	5.68e-05	0.0006214	6.5e-06	0.107477	0.000535048	<0.001				0.0562958	0.000349298	<0.01		5.17412	0.0375185	<0.001				77.3224		<0.001
LANL	NG_12-8_18	Surface	2012-08-06	Aug	drainage	River	0	Surface	Northern_Drainage	7.91159e+06	586190	71.2912	-156.592				23.977	15.262		5.915							<0.001		0.001099	3.88e-05	0.0448696	0.000470621	<0.001				0.0381549	0.000212097	<0.01		10.2135	0.0483525	<0.001				170.372		0.002217
LANL	NG_12-8_19	Surface	2012-08-06	Aug	drainage	River	0	Surface	Northern_Drainage	7.91183e+06	585928	71.2934	-156.599				9.27	7.719		6.515							0.0022337	1.75e-05	0.0008939	6.47e-05	0.0566906	2.56031e-05	<0.001				0.0344058	0.000480891	<0.01		19.0044	0.0124196	<0.001				208.547		0.0012273
LANL	NG_12-8_20	Surface	2012-08-06	Aug	drainage	Pond	0	Surface	Northern_Drainage	7.91202e+06	585887	71.2951	-156.6				17.353	18.338		6.712							<0.001		0.0012157	4e-06	0.0445248	0.000906448	<0.001				0.029174	0.000706186	<0.01		9.60157	0.116713	<0.001				87.4395		<0.001
LANL	NG_12-8_21	Surface	2012-08-06	Aug	drainage	Lake	0	Surface	Cakeeater_Lake	7.90999e+06	584605	71.2774	-156.638				8.839	11.38		6.701							0.0118775	0.0002113	0.0006965	2.19e-05	0.0269844	3.43902e-05	<0.001				0.024914	0.000285218	<0.01		4.31538	0.0203371	<0.001				23.4868		<0.001
LANL	NG_12-9_18	Rhiz	2012-09-12	Sept	Low	Trough	25.4	Deep	A	7.91049e+06	585541	71.2816	-156.611														1.36441	0.0004975	0.0831852	0.0002267	0.503738	0.0039081	<0.01				2.41257	0.00523084	<0.01		18.7095	0.199502	<0.01				80.949		0.0272305
LANL	NG_12-9_19	Rhiz	2012-09-14	Sept	Low	Pond	25.4	Deep	D	7.91056e+06	585931	71.282	-156.6					32.167		6.93							0.280629	0.0019238	0.0468079	0.0003132	0.151526	0.0002101	<0.01				0.286199	0.000725163	<0.01		8.75542	0.0222076	<0.01				37.6779		0.0105267
LANL	NG_12-9_20	Rhiz	2012-09-14	Sept	High	Center	30.48	Deep	C	7.91041e+06	585943	71.2807	-156.6					26.0205		8.58							0.451398	0.0069662	0.0323508	3.27e-05	1.59404	0.0034186	<0.01				0.770201	0.00952966	<0.01		11.9271	0.226442	<0.01				45.1491		<0.01
LANL	NG_12-9_21	Rhiz	2012-09-14	Sept	High	Center	5.08	Shallow	C	7.91041e+06	585943	71.2807	-156.6					51.775		6.16							1.02072	0.0074856	0.0319208	0.0012022	0.147409	0.0019546	<0.01				0.240665	0.00394671	<0.01		4.92651	0.145992	<0.01				25.9694		<0.01
LANL	NG_12-9_22	Rhiz	2012-09-14	Sept	High	Trough	25.4	Deep	B	7.9103e+06	585799	71.2798	-156.604					77.932		6.74							1.25668	0.016398	0.0510528	0.0004881	0.205563	0.0022442	<0.01				0.294534	0.000890874	<0.01		11.9914	0.157798	<0.01				46.109		0.0198237
LANL	NG_12-9_23	Rhiz	2012-09-14	Sept	High	Center	30.48	Deep	B	7.91024e+06	585878	71.2792	-156.602					34.495		6.62							0.464359	0.0012818	0.0310838	0.0008541	1.93118	0.0215753	<0.01				0.807934	0.00376003	<0.01		14.1247	0.0631341	<0.01				54.5186		0.012967
LANL	NG_12-9_24	Wick	2012-09-14	Sept	High	Center	20.32	Deep	C	7.91041e+06	585942	71.2808	-156.6					20.433		6.88							0.120864	0.0022285	0.0123642	0.0005159	0.0366269	0.0004588	<0.01				0.604377	0.00270295	<0.01		10.9366	0.106606	<0.01				41.7201		<0.01
LANL	NG_12-9_25	Wick	2012-09-14	Sept	High	Center	5.08	Shallow	C	7.91042e+06	585940	71.2808	-156.6					47.098		6.91							0.140958	0.0010556	0.0175915	0.0001893	0.0430506	0.0002424	<0.01				0.521766	0.00501395	<0.01		9.97448	0.100913	<0.01				54.8906		<0.01
LANL	NG_12-9_26	Wick	2012-09-14	Sept	High	Center	5.08	Shallow	B	7.91024e+06	585878	71.2792	-156.602					33.563									0.0363211	0.002678	0.0015297	4.99e-05	0.0065246	0.0001305	<0.01				2.66289	0.0391742	<0.01		11.2874	0.0717938	<0.01				47.3593		<0.01
[truncated: 77 more columns]

## Sheet: Figure6R
	temperature °C	day0	day100		1e-12	g/cell	wet	CH2O0.5N0.15		Madigan
								0.494845	0.0927835	0.412371
Center organic	-2		400000000		100000000	0.0001	g/dwt soil	0.00833333	mmol C/g
	4		2000000000					0.00416667	mmolC/g
	8		2500000000
Center mineral	-2	300000000	60000000
	4		100000000
	8		100000000
Center perm	-2
	4
	8
Ridge organic	-2	300000000	100000000
	4		800000000
	8		900000000
Ridge mineral	-2	200000000	40000000
	4		500000000
	8		500000000
Trough organic	-2		300000000
	4		1000000000
	8		900000000
Trough mineral	-2	600000000	800000000
	4		700000000
	8		600000000

## Sheet: Table1
Table 1							molecular weight	45.017			C molecular weight
											12.0107
Table 1				Total soil 15 g
Topography location	Horizon	Depth (cm)	pH	Soil (dwt g)	Water (g)	TotC (g)	WEOC (mg)	Formate (mgC)	Acetate (mgC)	Propionate (mgC)	Fe(II) (mmol)	TOC/dwt Soil	WEOC/TotC	Acids/WEOC	Bulk density	headspace volume (ml)		toc/total soil
Center	Oa	6-21.5	5.02	1.41243	13.5876	0.541667	9.58481	0.316182	1.71854	0.0444627	0.0107203	0.3835	0.017695	0.216925	0.91065	42.5282		0.0361111
	Bgh	21.5-53.5	4.84	9.14634	5.85366	1.26037	3.84489	0.0198306	0.352353	0.0213338	0.130152	0.1378	0.00305061	0.102348				0.0840244
	Ice	53.5-93
Ridge	Oe	0-8	5.21	3.21199	11.788	1.24914	6.78977	0.00120025	0.0046282	0.0104135	0.0189829	0.3889	0.00543554	0.00239211	1.00034	44.0051		0.0832762
	Bh	8-42	4.54	8.62069	6.37931	1.26267	3.28223	0.0269947	0.341963	0.0399436	0.146552	0.14647	0.00259943	0.12458				0.0841782
Trough	Oe	0-19	5.23	4.31034	10.6897	0.885776	3.32365	0.00159582	0.00622758	0.0140121	0.167457	0.2055	0.00375225	0.00656972	0.972416	43.5745		0.0590517
	Bh/ice	25-69	4.95	8.37989	6.62011	0.669553	2.01297	0.0204262	0.261686	0.0103691	0.047514	0.0799	0.00300643	0.145298				0.0446369
Table 1
Topography location	Horizon	Depth (cm)	pH	Soil (dwt g)	Water (g)	TotC (g)	WEOC (mg)	Acetate (mgC)	Fe(II) (mmol)	Bulk density	headspace volume (ml)
Center	Oa	6-21.5	5.02	1.41243	13.5876	0.541667	9.58481	2.07919	0.0107203	0.91065	42.5282
	Bgh	21.5-53.5	4.84	9.14634	5.85366	1.26037	3.84489	0.393517	0.130152
Ridge	Oe	0-8	5.21	3.21199	11.788	1.24914	6.78977	0.0162419	0.0189829	1.00034	44.0051
	Bh	8-42	4.54	8.62069	6.37931	1.26267	3.28223	0.408902	0.146552
Trough	Oe	0-19	5.23	4.31034	10.6897	0.885776	3.32365	0.0218355	0.167457	0.972416	43.5745
	Bh/ice	25-69	4.95	8.37989	6.62011	0.669553	2.01297	0.292481	0.047514
								min	4
Table S1								opt	7
								max	10
		Formate (mgC)	Acetate (mgC)	Propionate (mgC)	TOC/dwt Soil	WEOC/TotC	Acids/WEOC	f(pH)	f(pH)	f(pH)
Center	Oa	0.316182	1.71854	0.0444627	0.3835	0.017695	0.216925	0.486032	0.559525				-0.313335
	Bgh	0.0198306	0.352353	0.0213338	0.1378	0.00305061	0.102348	0.383925	0.525159				-0.415754
Ridge	Oe	0.00120025	0.0046282	0.0104135	0.3889	0.00543554	0.00239211	0.601258	0.599192				-0.220939
	Bh	0.0269947	0.341963	0.0399436	0.14647	0.00259943	0.12458	0.240639	0.474304				-0.618635
Trough	Oe	0.00159582	0.00622758	0.0140121	0.2055	0.00375225	0.00656972	0.613547	0.603576				-0.212152
	Bh/ice	0.0204262	0.261686	0.0103691	0.0799	0.00300643	0.145298	0.445201	0.545798				-0.351444
-2
4
8

## Sheet: input
			pH	H2O (kg)	Headspace (L)	Fe(II) (mM)	Acetate (mM)	Sugar (mMC)	WEOC - known (mM)	SOM1	SOM2	SOM3	SOM4				WEOC (mM)	Totol C (M)	Formate (mM)	Acetate (mM)	Propionate (mM)
Topography location	Horizon							0.03		0.1	0.2	0.3	0.4
Center	O	-2	5.02	0.0135876	0.0425282	0.788981	6.37021	0.293659	45.9914	0.331911	0.663823	0.995734	1.32765				58.7318	3.31911	1.93743	5.26527	0.0908165
		4
		8
	M	-2	4.84	0.00585366	0.0425282	22.2344	2.79858	0.273438	49.0903	1.79267	3.58534	5.37802	7.17069				54.6875	17.9267	0.282059	2.50583	0.101147
		4
		8
	P	-2
		4
		8
Ridge	O	-2	5.21	0.011788	0.0440051	0.101819	0.0573585	0.239782	47.8417	0.882274	1.76455	2.64682	3.5291				47.9564	8.82274	0.00847738	0.0163446	0.0245169
		4
		8
	M	-2	4.54	0.00637931	0.0440051	22.973	2.66837	0.214189	37.5011	1.64797	3.29593	4.9439	6.59187				42.8378	16.4797	0.35232	2.23155	0.173773
		4
		8
Trough	O	-2	5.23	0.0106897	0.0435745	15.6653	1.02622	0.129435	23.8347	0.689909	1.37982	2.06973	2.75964				25.8871	6.89909	0.15	0.292683	0.439024
		4
		8
	M	-2	4.95	0.00662011	0.0435745	7.17722	1.83922	0.126582	21.638	0.842076	1.68415	2.52623	3.3683				25.3165	8.42076	0.256894	1.64557	0.0434695
		4
		8

## Sheet: obs
	t				0	15	30	60		0	15	30	60	0	30	60	0	30	60	0	30	60	0	30	60	0	30	60		0	30	60
			Soil dwt (g)	H2O (kg)	pH				Headspace (L)	Fe(II) (mM)				Formate (mM)			Acetate (mM)			Propionate (mM)			Butyrate (mM)			WEOC
Topography location	Horizon
Center	O	-2	1.41243	0.0135876	5.02	5.02	5.38	5.71	0.0425282	0.788981	10.5405	10.1975	12.7339	1.93743	0.219655	0.228027	5.26527	9.12	7.90692	0.0908165	1.33646	1.39891	0	1.73811	1.47899	58.7318	75.2599	60.1871		6.37021	14.7107	13.0773
		4	1.41243	0.0135876		5.09	5.62	5.32			6.60083	12.5676	15.6237	1.93743	0.283041	0.00318919	5.26527	12.2534	1.75819	0.0908165	2.02967	2.26976	0	1.24378	0.753446	58.7318	65.3846	63.7214		6.37021	17.927	6.67131
		8	1.41243	0.0135876		5.09	5.31	5.42			9.28274	16.0915	16.6008	1.93743	0.355993	0.0283041	5.26527	14.4221	0.486208	0.0908165	2.88214	2.16326	0	1.13216	0.801284	58.7318	69.6466	62.1622		6.37021	21.1877	5.34782
	M	-2	9.14634	0.00585366	4.84	4.83	5.67	4.9	0.0425282	22.2344	33.4375	109.219	290.469	0.282059	0.288519	0.0473688	2.50583	6.25218	0.0407926	0.101147	1.40143	0.140421				54.6875	55.9375	48.125		2.79858	8.49858	0.275109
		4	9.14634	0.00585366		4.9	5.74	5.81			30.625	75.625	309.844	0.282059	0.292825	0.0473688	2.50583	5.19583	0.0835169	0.101147	1.54664	0.140421				54.6875	57.3438	62.5		2.79858	7.6622	0.317833
		8	9.14634	0.00585366		4.88	5.89	6.1			38.4375	57.3438	84.375	0.282059	0.279906	0.0473688	2.50583	4.8885	0.0936141	0.101147	0.926877	0.140421				54.6875	52.0313	40.3125		2.79858	6.41876	0.32793
	P	-2
		4
		8
Ridge	O	-2	3.21199	0.011788	5.21	5.5	6	6	0.0440051	0.101819	7.30245	20.8447	23.7602	0.00847738	0.0116564		0.0163446	0.199098		0.0245169	0.0245169					47.9564	56.1308			0.0573585	0.241702	0
		4	3.21199	0.011788		5.21	5.92	6.02			2.6158	19.5095	37.4932	0.00847738	0.00847738		0.0163446	0.00931424		0.0245169	0.0245169					47.9564	68.3924			0.0573585	0.0503282	0
		8	3.21199	0.011788		5.21	5.98	6.21			2.34332	17.9019	31.3079	0.00847738	0.058282		0.0163446	1.29402		0.0245169	0.612534					47.9564	65.9401			0.0573585	2.24196	0
	M	-2	8.62069	0.00637931	4.54	4.5	5.5	5.03	0.0440051	22.973	37.5676	44.1892	32.5676	0.35232	0.362216	0.0415658	2.23155	2.19783	0.0813421	0.173773	1.54422	0.122013				42.8378	51.7568	30.4054		2.66837	4.69528	0.285145
		4	8.62069	0.00637931		4.54	5.34	5.12			30.8108	44.0541	33.5135	0.35232	0.0415658	0.0415658	2.23155	1.07549	0.0813421	0.173773	0.64669	0.122013				42.8378	47.2973	45		2.66837	2.06631	0.285145
		8	8.62069	0.00637931		4.54	4.6	4.9			24.8649	43.7838	38.2432	0.35232	0.0415658	0.0415658	2.23155	0.554964	0.0813421	0.173773	1.24686	0.122013				42.8378	42.8378	46.2162		2.66837	2.44604	0.285145
Trough	O	-2	4.31034	0.0106897	5.23	5.2	5.1	5.2	0.0435745	15.6653	25.3629	32.2581	27.8226	0.15	0.08	0.29	0.292683	1.98218	1.98557	0.439024	1.20438	0.439024				25.8871	34.9597	43.5484		1.02622	3.82874	2.78911
		4	4.31034	0.0106897		5.23	5.11	5.76			21.8145	34.0323	33.0645	0.15	3.55	0.09	0.292683	58.3938	0.891699	0.439024	22.2756	0.439024				25.8871	41.5323	56.8548		1.02622	93.5823	1.59524
		8	4.31034	0.0106897		5.23	5.55	6.15			16.0484	28.0645	34.1532	0.15	3	0.11	0.292683	58.3938	1.59293	0.439024	40.6049	0.439024				25.8871	49.1935	38.9919		1.02622	120.801	2.30647
	M	-2	8.37989	0.00662011	4.95	5.1	5.61	5.9	0.0435745	7.17722	23.038	30.8861	44.8101	0.256894	0.187108	0.0384329	1.64557	1.64234	0.0759494	0.0434695	0.896152	0.113924				25.3165	50.6329	47.4684		1.83922	3.08012	0.266052
		4	8.37989	0.00662011		4.95	5.39	5.61						0.256894	0.703929	0.0384329	1.64557	1.55872	0.0292634	0.0434695	0.259694	0.113924				25.3165	38.9873	23.1646		1.83922	2.30022	0.219366
		8	8.37989	0.00662011		4.95	5.53	5.98						0.256894	0.137549	0.0384329	1.64557	1.82484	0.0759494	0.0434695	1.27927	0.113924				25.3165	35.8228	34.8101		1.83922	3.81253	0.266052
									45	ml
									15	ml

[truncated: 2 more sheets: Sheet1, Sheet2]
