# Supplementary material for: Biogeochemical model of CO 2 and CH 4 production in anoxic Arctic soil microcosms
Source: Copernicus journal article supplement (doi:10.5194/bg-2016-207), 2016-05-20
Supplement: Supplementary file 2 [file bg-2016-207-supplement.zip]

Archive with 160 entries (99 files):
- bgcs/
- bgcs/.DS_Store
- bgcs/.git/
- bgcs/.git/branches/
- bgcs/.git/config
- bgcs/.git/description
- bgcs/.git/HEAD
- bgcs/.git/hooks/
- bgcs/.git/hooks/applypatch-msg.sample
- bgcs/.git/hooks/commit-msg.sample
- bgcs/.git/hooks/post-update.sample
- bgcs/.git/hooks/pre-applypatch.sample
- bgcs/.git/hooks/pre-commit.sample
- bgcs/.git/hooks/pre-push.sample
- bgcs/.git/hooks/pre-rebase.sample
- bgcs/.git/hooks/prepare-commit-msg.sample
- bgcs/.git/hooks/update.sample
- bgcs/.git/index
- bgcs/.git/info/
- bgcs/.git/info/exclude
- bgcs/.git/logs/
- bgcs/.git/logs/HEAD
- bgcs/.git/logs/refs/
- bgcs/.git/logs/refs/heads/
- bgcs/.git/logs/refs/heads/master
- bgcs/.git/logs/refs/remotes/
- bgcs/.git/logs/refs/remotes/origin/
- bgcs/.git/logs/refs/remotes/origin/HEAD
- bgcs/.git/objects/
- bgcs/.git/objects/info/
- bgcs/.git/objects/pack/
- bgcs/.git/objects/pack/pack-ba0aaec45aa72a93fb082555c7de05ab7aac3b1d.idx
- bgcs/.git/objects/pack/pack-ba0aaec45aa72a93fb082555c7de05ab7aac3b1d.pack
- bgcs/.git/packed-refs
- bgcs/.git/refs/
- bgcs/.git/refs/heads/
- bgcs/.git/refs/heads/master
- bgcs/.git/refs/remotes/
- bgcs/.git/refs/remotes/origin/
- bgcs/.git/refs/remotes/origin/HEAD
- bgcs/.git/refs/tags/
- bgcs/data/
- bgcs/data/lcp_center.txt
- bgcs/data/lcp_ridge.txt
- bgcs/data/lcp_trough.txt
- bgcs/data/microcosmmodel.xlsx
- bgcs/figures/
- bgcs/figures/fig1/
- bgcs/figures/fig1/fig1.pptx
- bgcs/figures/fig2/
- bgcs/figures/fig2/fig2.py
- bgcs/figures/fig3/
- bgcs/figures/fig3/fig3.py
- bgcs/figures/fig4/
- bgcs/figures/fig4/fig4.py
- bgcs/figures/fig5/
- bgcs/figures/fig5/fig5.py
- bgcs/figures/fig6/
- bgcs/figures/fig6/fig6.py
- bgcs/figures/fig7/
- bgcs/figures/fig7/fig7.py
- bgcs/figures/figs1/
- bgcs/figures/figs1/figs1.py
- bgcs/figures/figs2/
- bgcs/figures/figs2/figs2.py
- bgcs/figures/figs3/
- bgcs/figures/figs3/figs3.py
- bgcs/figures/figs4/
- bgcs/figures/figs4/figs4.py
- bgcs/figures/figs5/
- bgcs/figures/figs5/figs5.py
- bgcs/figures/figs6/
- bgcs/figures/figs6/figs6.py
- bgcs/figures/figs7/
- bgcs/figures/figs7/figs7.py
- bgcs/figures/figs8/
- bgcs/figures/figs8/figs8.py
- bgcs/figures/figs9/
- bgcs/figures/figs9/figs9.py
- bgcs/figures/figsa/
- bgcs/figures/figsa/figsb.py
- bgcs/simulations/
- bgcs/simulations/arrhenius/
- bgcs/simulations/arrhenius/createinput.py
- bgcs/simulations/arrhenius/writephrq.py
- bgcs/simulations/base/
- bgcs/simulations/base/createinput.py
- bgcs/simulations/base/writephrq.py
- bgcs/simulations/bio1/
- bgcs/simulations/bio1/createinput.py
- bgcs/simulations/bio1/run
- bgcs/simulations/bio1/writephrq.py
- bgcs/simulations/bio2/
- bgcs/simulations/bio2/createinput.py
- bgcs/simulations/bio2/writephrq.py
- bgcs/simulations/century/
- bgcs/simulations/century/createinput.py
- bgcs/simulations/century/writephrq.py
- bgcs/simulations/database/
- bgcs/simulations/database/redox.dat
- bgcs/simulations/database/redox_co2s.dat
- bgcs/simulations/fe31/
- bgcs/simulations/fe31/createinput.py
- bgcs/simulations/fe31/writephrq.py
- bgcs/simulations/fe31_co2s/
- bgcs/simulations/fe31_co2s/createinput.py
- bgcs/simulations/fe31_co2s/writephrq.py
- bgcs/simulations/fe32/
- bgcs/simulations/fe32/createinput.py
- bgcs/simulations/fe32/writephrq.py
- bgcs/simulations/final/
- bgcs/simulations/final/createinput.py
- bgcs/simulations/final/writephrq.py
- bgcs/simulations/labile0/
- bgcs/simulations/labile0/createinput.py
- bgcs/simulations/labile0/run
- bgcs/simulations/labile0/writephrq.py
- bgcs/simulations/labile1/
- bgcs/simulations/labile1/createinput.py
- bgcs/simulations/labile1/writephrq.py
- bgcs/simulations/labile2/
- bgcs/simulations/labile2/createinput.py
- bgcs/simulations/labile2/writephrq.py
- bgcs/simulations/phdlem/
- bgcs/simulations/phdlem/createinput.py
- bgcs/simulations/phdlem/writephrq.py
- bgcs/simulations/phtem/
- bgcs/simulations/phtem/createinput.py
- bgcs/simulations/phtem/writephrq.py
- bgcs/simulations/q10/
- bgcs/simulations/q10/createinput.py
- bgcs/simulations/q10/writephrq.py
- bgcs/simulations/ratkowsky/
- bgcs/simulations/ratkowsky/createinput.py
- bgcs/simulations/ratkowsky/writephrq.py
- bgcs/simulations/run
- bgcs/simulations/slabile2/
- bgcs/simulations/slabile2/createinput.py
- bgcs/simulations/slabile2/writephrq.py
- bgcs/simulations/slabile6/
- bgcs/simulations/slabile6/createinput.py
- bgcs/simulations/slabile6/writephrq.py
- bgcs/simulations/solubility/
- bgcs/simulations/solubility/run
- bgcs/simulations/solubility/sol2.phrq
- bgcs/simulations/solubility/sol25.phrq
- bgcs/simulations/solubility/sol4.phrq
- bgcs/simulations/solubility/sol8.phrq
- bgcs/simulations/solubility_co2s/
- bgcs/simulations/solubility_co2s/sol2.phrq
- bgcs/simulations/solubility_co2s/sol25.phrq
- bgcs/simulations/solubility_co2s/sol4.phrq
- bgcs/simulations/solubility_co2s/sol8.phrq
- bgcs/simulations/wham1/
- bgcs/simulations/wham1/createinput.py
- bgcs/simulations/wham1/writephrq.py
- bgcs/simulations/wham2/
- bgcs/simulations/wham2/createinput.py
- bgcs/simulations/wham2/writephrq.py
- bgcs/supplement.pdf
