# Supplementary material for: Biogeochemical model of CO 2 and CH 4 production in anoxic Arctic soil microcosms
Source: Copernicus journal article supplement (doi:10.5194/bg-2016-207), 2016-05-20
Supplement: Supplementary file 2 [file bg-2016-207-supplement.zip › bgcs/data/lcp_center.txt]

#co2	-2			4			8			-2			4			8		ch4	-2			4			8			-2			4			8
#	1	2	3	1	2	3	1	2	3	1	2	3	1	2	3	1	2	3	1	2	3	1	2	3	1	2	3	1	2	3	1	2	3	1	2	3
2	0	0	0	1.840821567	1.825924215	1.29072589	2.36187009	3.093793427	2.405711237	0	0	0	1.099858392	0.81878855	2.444528722	2.182128704	1.487062538	1.319951403	0	0	0	0.060615219	0.05444685	0	0.244263678	0.130981094	0.062979581	0	0	0	0.023345556	0.000656194	0.060239161	0.06357034	0.021173191	0.031394657
3	1.120389319	1.642551777	1.186014482	2.488178603	2.504696581	1.772277743	4.07732803	5.451203089	5.270180565	1.162103608	0.955346176	0.974830231	0.971160887	0.932451337	1.858203758	2.517378502	1.868851155	1.718390471	0.027835005	0.021256437	0.027572224	0.116376507	0.1039289	0.051413957	0.575831348	0.510150248	0.24327529	0.073388313	0.018749501	0.033597517	0.053213133	0.014650942	0.065983468	0.091873596	0.046824427	0.064304185
5	2.243685591	3.687581534	2.284931969	5.338274067	4.72680201	3.909771592	7.496212001	10.38496962	11.6393434	1.617120691	1.411890471	1.232446219	1.32165164	1.026601804	2.93566899	3.144649054	2.725131265	3.217004554	0.061406199	0.053235554	0.040149784	0.260061602	0.181539606	0.143325721	0.684477949	0.771789972	0.494625871	0.073942176	0.032542816	0.033718386	0.061876071	0.06205871	0.066727221	0.099163092	0.071910818	0.073293605
9	3.022802658	4.833312639	3.461414978	10.48362322	11.54823785	9.658054121	10.34403941	13.81823435	14.32313718	1.690080682	1.467993391	1.654159584	2.046995505	2.168657378	3.986401571	4.942695749	3.988972142	4.56432603	0.09863872	0.076549593	0.084355804	1.267965696	1.290710683	0.636296646	1.521799393	1.739117085	1.402721215	0.12295432	0.085506985	0.09006715	0.075159959	0.083312687	0.065511878	0.155644122	0.106427201	0.130176497
11	3.315279441	5.559834893	3.60836406	10.53672023	12.08890792	9.880529417	10.62965175	14.17704291	14.54038131	1.783854867	1.563147735	1.734696979	2.126114753	2.422798291	4.223202199	5.156750235	4.956476924	4.674391945	0.070720374	0.034090494	0.0350617	1.434244887	1.443291256	0.825872023	1.987599301	1.74863668	1.615592397	0.134196924	0.113535291	0.116966162	0.091052839	0.088307987	0.08613877	0.161086283	0.119464806	0.140859027
13	3.531388807	6.145836007	3.733876635	10.70135823	12.15394275	10.17993299	13.58313682	14.30479493	15.96896707	1.778292607	1.671442885	1.772202532	2.284898037	2.919478301	4.831815278	5.219287779	5.437775745	4.775352048	0.080217367	0.036738492	0.03743124	1.513792642	1.510939802	0.929462937	1.990612431	1.924241824	1.67760487	0.151228783	0.127584239	0.130651164	0.092266327	0.095302257	0.108371881	0.176074827	0.120846775	0.149062094
21	5.176596184	8.853355236	3.810896118	11.00791356	12.17470461	10.20881376	13.14749331	14.03523018	15.7085448	1.80362718	1.756312468	1.813958679	2.847939108	3.425940389	5.249567062	6.190911906	6.473362185	5.542913882	0.094730084	0.05092351	0.06078808	2.693091418	2.779392929	1.783374557	3.096604979	3.799720259	3.3226409	0.145258445	0.139456502	0.142246061	0.163711027	0.15649436	0.112392605	0.321629808	0.123421706	0.282872608
26	6.757173873	10.69492443	6.179339288	11.1889508	12.57811052	10.26297289	15.58388718	15.03001336	16.17303393	1.887918309	1.824756047	1.924029368	3.687093049	3.746575545	5.688465007	6.492782732	6.994528627	6.101042743	0.134309187	0.067596107	0.078027566	2.910045799	3.16676108	2.012597348	4.409671322	4.053651147	3.641435124	0.184403888	0.157084404	0.161107875	0.216030914	0.183378324	0.150330452	0.391200419	0.194022343	0.378411075
31	8.318508379	13.45030784	5.056308685	10.73317358	12.46852229	10.26633094	12.13033839	15.40049704	15.68864753	1.992242013	1.85670339	2.067997887	3.798303943	3.715878271	5.606473568	6.994675018	7.490838318	6.436081144	0.157232125	0.103545335	0.099793413	2.919738886	3.182885007	2.049166855	4.42166327	4.349582521	3.735330838	0.205179062	0.166603229	0.171363575	0.225649335	0.195662252	0.165961824	0.547106513	0.265009757	0.53459474
35	9.430408966	13.59268794	9.601991802	10.96473142	12.57734814	10.27687415	12.16726977	15.47945707	15.82691666	2.012635685	1.87616401	2.088913064	4.028684721	4.053652309	5.732368078	7.172085964	7.638870877	6.558421498	0.172806612	0.110066791	0.103834368	2.951099474	3.300263135	2.104288133	4.487200344	4.41704188	3.872400035	0.213042538	0.190115422	0.177318231	0.241856966	0.210327455	0.195946153	0.643060251	0.337175255	0.640215605
42	13.52080548	17.51479098	11.18389483	15.25879955	16.23262194	13.68404316	15.63225821	18.86197692	20.74110691	2.489521881	2.504918755	2.674280429	5.389794525	5.353433853	7.875274776	7.80833212	8.580068929	7.329451584	0.174817288	0.124151811	0.162748406	3.087307128	3.479367156	2.141970019	4.503826488	4.453482724	3.942373242	0.186740579	0.172255392	0.157933302	0.219537945	0.195904643	0.183379829	0.806055219	0.482844105	0.817654744
49	15.69405579	19.06618057	12.43049859	15.51317646	16.62837458	13.80796485	19.15069249	19.21568898	20.85787135	2.849162769	2.661745477	2.681896872	5.809066704	5.769484401	8.0816297	9.743600925	10.55557084	9.153551251	0.214210569	0.182961031	0.193231872	3.862069513	3.99031432	2.526298629	5.382969575	5.220649809	4.725403702	0.22614146	0.202246455	0.184614903	0.265708269	0.229222013	0.189730624	1.203741061	0.703048922	1.187827772
56	14.12424325	18.47308258	10.22580342	14.51885902	15.51752632	13.12380073	15.68005775	18.44507217	19.72377425	2.846177278	2.6251557	2.872165981	5.501354579	5.740057159	7.545434681	9.079776418	9.851531607	8.649479085	0.244283587	0.203651389	0.204090014	3.889995274	4.106656529	2.600250321	4.279067622	4.886463131	4.433507051	0.134922264	0.072130531	0.076428206	0.280499886	0.236192436	0.197808031	1.063759618	0.661926702	1.076771578
62	17.3152389	23.36717334	13.9952538	18.40953314	19.58366328	16.43756863	19.80122899	23.70813814	21.28147426	3.650132519	3.448717016	3.707669339	7.34139653	7.096373537	9.699925718	11.54760644	11.52912184	11.21633801	0.246433195	0.220510541	0.217932149	3.679661727	3.696112904	2.476488352	4.358462822	5.049072911	4.391599132	0.145941378	0.0810298	0.136455259	0.326039257	0.236144056	0.216986953	1.462748008	1.816009031	1.516059646
