# Supplementary material for: Biogeochemical model of CO 2 and CH 4 production in anoxic Arctic soil microcosms
Source: Copernicus journal article supplement (doi:10.5194/bg-2016-207), 2016-05-20
Supplement: Supplementary file 2 [file bg-2016-207-supplement.zip › bgcs/simulations/labile0/run]

phreeqc co2.phrq co2.out | \
phreeqc co4.phrq co4.out | \
phreeqc co8.phrq co8.out | \
phreeqc ro2.phrq ro2.out | \
phreeqc ro4.phrq ro4.out | \
phreeqc ro8.phrq ro8.out | \
phreeqc to2.phrq to2.out | \
phreeqc to4.phrq to4.out | \
phreeqc to8.phrq to8.out
