# Supplementary material for: Biogeochemical model of CO 2 and CH 4 production in anoxic Arctic soil microcosms
Source: Copernicus journal article supplement (doi:10.5194/bg-2016-207), 2016-05-20
Supplement: Supplementary file 2 [file bg-2016-207-supplement.zip › bgcs/simulations/solubility/run]

phreeqc sol2.phrq | \
phreeqc sol4.phrq | \
phreeqc sol8.phrq | \
phreeqc sol25.phrq
